# Supplementary material for: Generation and Trapping of a Mesoderm Biased State of Human Pluripotency
Source: bioRxiv or medRxiv preprint supplement (doi:10.1101/813071), 2019-10-24
Supplement: Supplementary file [file media-1.pdf]

**Table 1 Single Cell qPCR assay list**

| Assay ID      | Gene Symbol   | RefSeq                                                                                    | Amplicon Length | Detects gDNA | Best Coverage |
|---------------|---------------|-------------------------------------------------------------------------------------------|-----------------|--------------|---------------|
| Hs01060665_g1 | <i>ACTB</i>   | NM_001101.3                                                                               | 63              | Yes          | Yes           |
| Hs00154192_m1 | <i>BMP2</i>   | NM_001200.2                                                                               | 60              | No           | Yes           |
| Hs03676628_s1 | <i>BMP4</i>   | NM_130850.2;NM_001202.3;<br>NM_130851.2                                                   | 116             | Yes          | Yes           |
| Hs01034913_g1 | <i>BMPR1A</i> | NM_004329.2                                                                               | 94              | Yes          | Yes           |
| Hs00193796_m1 | <i>CER1</i>   | NM_005454.2                                                                               | 92              | No           | Yes           |
| Hs01897804_s1 | <i>CITED2</i> | NM_001168388.2;NM_00116<br>8389.2;NM_006079.4                                             | 106             | Yes          | Yes           |
| Hs00607528_s1 | <i>CLDN6</i>  | NM_021195.4                                                                               | 154             | Yes          | Yes           |
| Hs00164004_m1 | <i>COL1A1</i> | NM_000088.3                                                                               | 66              | No           | Yes           |
| Hs00976734_m1 | <i>CXCR4</i>  | NM_003467.2;NM_00100854<br>0.1                                                            | 153             | No           | No            |
| Hs00171876_m1 | <i>DNMT3B</i> | NM_001207055.1;NM_00120<br>7056.1;NM_175848.1;NM_17<br>5849.1;NM_175850.2;NM_00<br>6892.3 | 55              | No           | Yes           |
| Hs00172872_m1 | <i>EOMES</i>  | NM_001278183.1;NM_00127<br>8182.1;NM_005442.3                                             | 81              | No           | Yes           |
| Hs01549976_m1 | <i>FN1</i>    | NM_212482.1;NM_054034.2;<br>NM_002026.2;NM_212478.1;<br>NM_212474.1;NM_212476.1           | 81              | No           | Yes           |
| Hs00232764_m1 | <i>FOXA2</i>  | NM_021784.4;NM_153675.2                                                                   | 66              | No           | Yes           |
| Hs00255287_s1 | <i>FOXD3</i>  | NM_012183.2                                                                               | 78              | Yes          | Yes           |
| Hs00173503_m1 | <i>FRZB</i>   | NM_001463.3                                                                               | 108             | No           | Yes           |
| Hs00246256_m1 | <i>FST</i>    | NM_006350.3;NM_013409.2                                                                   | 108             | No           | No            |
| Hs00544355_m1 | <i>GAL</i>    | NM_015973.3                                                                               | 125             | No           | Yes           |
| Hs00171403_m1 | <i>GATA4</i>  | NM_002052.3                                                                               | 68              | No           | Yes           |
| Hs00232018_m1 | <i>GATA6</i>  | NM_005257.4                                                                               | 91              | No           | Yes           |
| Hs00906630_g1 | <i>GSC</i>    | NM_173849.2                                                                               | 100             | No           | No            |
| Hs00193435_m1 | <i>HAS2</i>   | NM_005328.2                                                                               | 63              | No           | Yes           |
| Hs00242160_m1 | <i>HHEX</i>   | NM_002729.4                                                                               | 110             | Yes          | Yes           |
| Hs00705137_s1 | <i>IFITM1</i> | NM_003641.3                                                                               | 93              | Yes          | Yes           |
| Hs01547673_m1 | <i>ITGA5</i>  | NM_002205.2                                                                               | 54              | No           | Yes           |
| Hs00761767_s1 | <i>KRT19</i>  | NM_002276.4                                                                               | 116             | Yes          | Yes           |
| Hs00764128_s1 | <i>LEFTY1</i> | NM_020997.3                                                                               | 136             | Yes          | Yes           |
| Hs00745761_s1 | <i>LEFTY2</i> | NM_001172425.1;NM_00324<br>0.3                                                            | 102             | Yes          | Yes           |
| Hs00355202_m1 | <i>LGALS1</i> | NM_002305.3                                                                               | 63              | No           | Yes           |
| Hs00232144_m1 | <i>LHX1</i>   | NM_005568.3                                                                               | 60              | No           | Yes           |
| Hs00702808_s1 | <i>LIN28A</i> | NM_024674.4                                                                               | 143             | Yes          | Yes           |
| Hs00430824_g1 | <i>MIXL1</i>  | NM_031944.1                                                                               | 152             | No           | No            |
| Hs00899658_m1 | <i>MMP1</i>   | NM_001145938.1;NM_00242<br>1.3                                                            | 64              | No           | Yes           |

| Assay ID      | Gene Symbol   | RefSeq                                    | Amplicon Length | Detects gDNA | Best Coverage |
|---------------|---------------|-------------------------------------------|-----------------|--------------|---------------|
| Hs01548727_m1 | <i>MMP2</i>   | NM_004530.4;NM_001127891.1                | 65              | No           | Yes           |
| Hs01085598_g1 | <i>MYL7</i>   | NM_021223.2                               | 74              | No           | Yes           |
| Hs04399610_g1 | <i>NANOG</i>  | NM_024865.2                               | 101             | Yes          | No            |
| Hs00378379_m1 | <i>NCLN</i>   | NM_020170.3                               | 65              | No           | Yes           |
| Hs00415443_m1 | <i>NODAL</i>  | NM_018055.4                               | 68              | No           | Yes           |
| Hs00219496_m1 | <i>PAF1</i>   | NM_019088.3;NM_001256826.1                | 100             | No           | Yes           |
| Hs04260367_gH | <i>POU5F1</i> | NM_001173531.1;NM_002701.4;NM_203289.4    | 77              | Yes          | Yes           |
| Hs01375212_g1 | <i>RPS18</i>  | NM_022551.2                               | 93              | Yes          | Yes           |
| Hs00183425_m1 | <i>SMAD2</i>  | NM_001135937.2;NM_001003652.3;NM_005901.5 | 129             | No           | No            |
| Hs00195591_m1 | <i>SNAI1</i>  | NM_005985.3                               | 66              | Yes          | Yes           |
| Hs00751752_s1 | <i>SOX17</i>  | NM_022454.3                               | 149             | Yes          | Yes           |
| Hs01053049_s1 | <i>SOX2</i>   | NM_003106.3                               | 91              | Yes          | Yes           |
| Hs00610080_m1 | <i>T</i>      | NM_001270484.1;NM_003181.3                | 132             | No           | Yes           |
| Hs00761239_s1 | <i>TAGLN2</i> | NM_001277224.1;NM_001277223.1;NM_003564.2 | 163             | No           | Yes           |
| Hs02339499_g1 | <i>TDGF1</i>  | NM_003212.3;NM_001174136.1                | 170             | Yes          | No            |
| Hs00902257_m1 | <i>WNT3</i>   | NM_030753.4                               | 76              | No           | Yes           |
