# Supplementary material for: Generation and Trapping of a Mesoderm Biased State of Human Pluripotency
Source: bioRxiv or medRxiv preprint supplement (doi:10.1101/813071), 2019-10-24
Supplement: Supplementary file [file media-2.pdf]

768

## Supplementary Figure Legends

769

### 770 **Figure 1: Single Cell qPCR analysis.**

771 Heatmap analysis of 232 single cells analysed across 45 genes using a Fluidigm BioMark  
772 system, hierarchical clustering was performed for the genes assessed. The heatmap  
773 visualises the individual gene expression after normalisation across genes and samples.  
774 White coloured genes indicates undetected levels. Black arrows indicate cells which appear  
775 to express pluripotency associated genes (particularly *SOX2*, *NANOG* and *POU5F1*) at a  
776 high level whilst also expressing early differentiation markers. Cells co-expressing  
777 pluripotency and differentiation associated genes were readily detected in the  
778 *MIXL1(+)/SSEA-3(+)* fraction but not the other fractions.

779

### 780 **Figure 2: Assessing the stem cell potential of *MIXL1(+)/SSEA-3(+)* substate.**

781 **a)** Live TRA-1-81 staining fluorescent images of colonies derived after the first passage into a  
782 48 well plate at 4x, TRA-1-81(RED) and *MIXL1*-GFP (GREEN). Wells marked with white stars  
783 indicates clones that survived the passage and stained positive for TRA-1-81. Of the 44  
784 colonies passaged, 27 survived and stained positive for TRA-1-81. **b)** Immunofluorescent  
785 analysis of NANOG expression in HES3 *MIXL1*-GFP clones 2-D2 and 3-C6 growing in E8V  
786 conditions. Merged images display Hoechst (Nuclei) in blue and NANOG positive cells in red.  
787 Secondary only staining control is also shown. **c)** Bar chart showing the percentage positive  
788 cells for the stem cell associated antigens BF4, CD9, SSEA-3, SSEA4, TRA-1-60s, TRA-1-81  
789 and TRA-2-49 for six clonal lines established (Mean of all lines +/- SD). All lines displayed  
790 high expression of these surface markers.

791

### 792 **Figure 3: Averaged qPCR Signature Comparison**

793 The average 1/Ct values for 47 genes from single cell qPCR analysis. Genes were ordered  
794 from highest to lowest expression based on the *MIXL1(-)/SSEA-3(+)* fraction. A solid line  
795 connects the mean expression points to give a state "signature" with surrounding shaded

796 area represents the 95% confidence interval of the data. **a)** Displays the state signatures of  
797 *MIXL1(-)/SSEA-3(+)*(red), *MIXL1(+)/SSEA-3(+)* (green) and *MIXL1(+)/SSEA-3(-)* (blue)  
798 grown in MEF/KOSR conditions. **b)** Displays the state signatures of *MIXL1(+)/SSEA-3(+)*  
799 cells grown in MEF/KOSR (green) and Primo (purple) conditions. The state signature of the  
800 both *MIXL1(+)/SSEA-3(+)* were very similar.

801

#### 802 **Figure 4: Single Cell Gene Expression Plots.**

803 The single cell gene expression distribution was similar between the two *MIXL1(+)/SSEA-*  
804 *3(+)* fractions from MEF/KOSR (green) and Primo (purple) conditions. 1/Ct values for each  
805 single cell for a given gene. Mean and standard deviation are displayed on top of data sets  
806 as black bars. Cells are split into their respective sorted fractions MEF/KOSR conditions  
807 *MIXL1(-)/SSEA-3(+)* cells in red, *MIXL1(+)/SSEA-3(+)* cells in green, *MIXL1(-)/SSEA-3(+)*  
808 cells in blue and Primo conditions *MIXL1(+)/SSEA-3(+)* cells in purple. **a)** Contains a  
809 collection of plots from genes associated with pluripotency. **b)** Contains a collection of plots  
810 from key genes associated with mesendoderm differentiation. **c-f)** Contains plots from the  
811 remaining genes assessed by single cell qPCR.

812

#### 813 **Figure 5: Differentiation Time Course**

814 Flow cytometry density plots of HES3 *MIXL1*-GFP cells stained for SSEA-3 at indicated time  
815 points after induction of differentiation in E8 containing 3 $\mu$ M CHIRON. Red boxes indicate  
816 the sorting gates for each timepoint. The expression of *MIXL1*-GFP increases first, before  
817 the eventual loss of SSEA-3.

818

#### 819 **Figure 6: Clones generated from the *MIXL1(+)/SSEA-3(+)* from Primo medium exhibit 820 normal stem cell growth and characteristics.**

821 **a)** Live TRA-1-81 staining fluorescent images of colonies derived from single cell deposition  
822 of *MIXL1(+)/SSEA-3(+)* from PRIMO Plus conditions after the first passage into a 48 well  
823 plate at 4x, TRA-1-81(RED) and *MIXL1*-GFP (GREEN). Wells marked with white stars

824 indicates clones that survived the passage and stained positive for TRA-1-81. **b)** Flow  
825 cytometry density plot of *MIXL1*-GFP versus SSEA-3 from clone 12-F11 grown in  
826 MEF/KOSR conditions. **c)** Bar chart of percentage positive stem cell associated antigen  
827 SSEA-3 and *MIXL1*-GFP expression for five clonal lines during initial expansion in  
828 MEF/KOSR conditions. **d)** Flow cytometry density plot of *MIXL1*-GFP versus SSEA-3 from  
829 clone 12-F11 after being transitioned into E8V conditions. **e)** Bar chart of percentage positive  
830 stem cell associated antigens BF4, CD9, SSEA-3, SSEA4, THY-1 and TRA-1-81 for six  
831 clonal lines. All lines displayed high expression of these surface markers.

832

833 **Figure 7: Components of Primo can be substituted for others that target the same**  
834 **pathway.**

835 **a-e)** Flow cytometry density plots of T-venus and SSEA-3 expression in different conditions.

836 **a)** In standard E8V conditions. **b)** Using PRIMO Plus formulation, IWP2 was replaced for  
837 DKK1 at 100ng/mL, density plot reveals high double expression 4 days after the first  
838 passage. **c)** CHIR99021 was replaced with SB216763 at 10 $\mu$ M, density plot reveals high  
839 double expression after 3 days of induction. **d)** LPA was replaced with S1P, density plots  
840 demonstrate the ability of S1P to block differentiation, 1.92 $\mu$ M S1P maintained a high  
841 proportion of double positive cells after 3 days of induction (optimal concentrated highlighted  
842 with a red box). **e)** LPA was replaced with GRI977143, density plots demonstrate the ability  
843 of GRI to block differentiation, 4 $\mu$ M GRI maintained a high proportion of double positive cells  
844 after 3 days of induction (optimal concentrated highlighted with a red box).

845

846 **Figure 8: Passage 10 NANOG and SOX2 expression Analysis**

847 Cells in all conditions at the tenth passage show high expression of NANOG and SOX2. **a-b)**  
848 Immunofluorescence analysis of Hoechst, *MIXL1*-GFP, and **a)** NANOG or **b)** SOX2  
849 expression of HES3 *MIXL1*-GFP cells in PRIMO Plus, E8+LPA (0.96 $\mu$ M), E8 alone, E8 with  
850 1 $\mu$ M IWP-2 added and E8+LPA (0.96 $\mu$ M) (Secondary antibody only staining) for 3 days post  
851 to 9 passages in PRIMO Plus. A merged image of all three channels is present below

852 Hoechst (Blue), *MIXL1*-GFP (Green) and NANOG or SOX2 (Red). **c-d**) Stacked percentage  
853 bar charts displaying cell profiler analysis of 3 wells for each condition (Bars are mean  $\pm$  SD,  
854 n= 3 technical repeats) for *MIXL1*-GFP, and **c**) NANOG or **d**) SOX2 expression grown in  
855 PRIMO Plus, E8+LPA (0.96 $\mu$ M), E8 alone and E8 with 1 $\mu$ M IWP-2 added, for 3 days post to  
856 9 passages in PRIMO Plus.  
857

S1

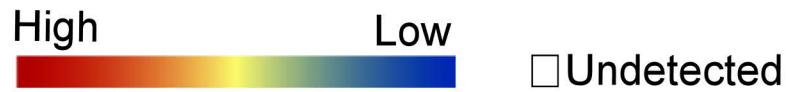

- Gene Groups**
- Pluripotency
  - Gastrulation
  - Mesendoderm
  - Mesoderm
  - WNT Signalling
  - BMP Signalling
  - Endoderm
  - Neural
  - Differentiation Factor

- SOX2
- NANOG
- POU5F1
- TDGF1
- LIN28A
- CLDN6
- IFITM1
- FN1
- DNMT3B
- CITED2
- SMAD2
- BMPR1A
- TAGLN2
- GAL
- HAS2
- SNAI1
- PAF1
- LGALS1
- NCLN
- KRT19
- ITGA5
- LEFTY2
- MMP2
- COL1A1
- NODAL
- LEFTY1
- FST
- BMP4
- CER1
- BMP2
- EOMES
- GATA6
- MYL7
- LHX1
- MIXL1
- GATA4
- WNT3
- SOX17
- FOXA2
- CXCR4
- FRZB
- T
- HHEX
- GSC
- FOXD3

MIXL1(-)/SSEA-3(+)

MIXL1(+)/SSEA-3(+)

MIXL1(+)/SSEA-3(-)

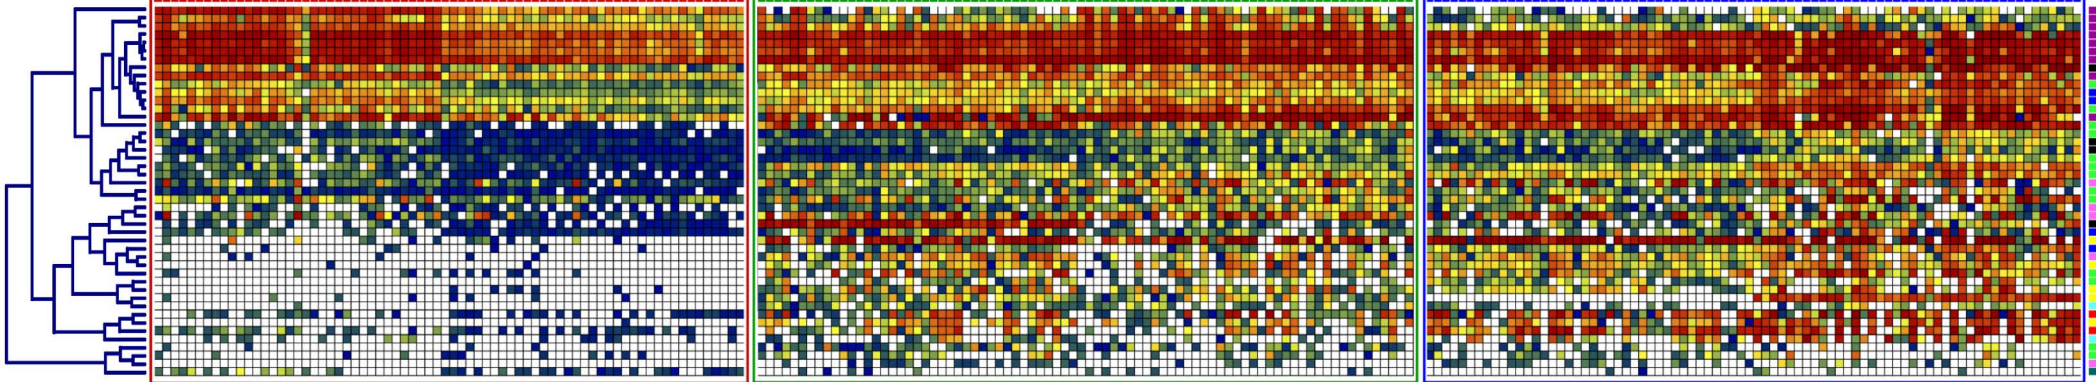

S2

a

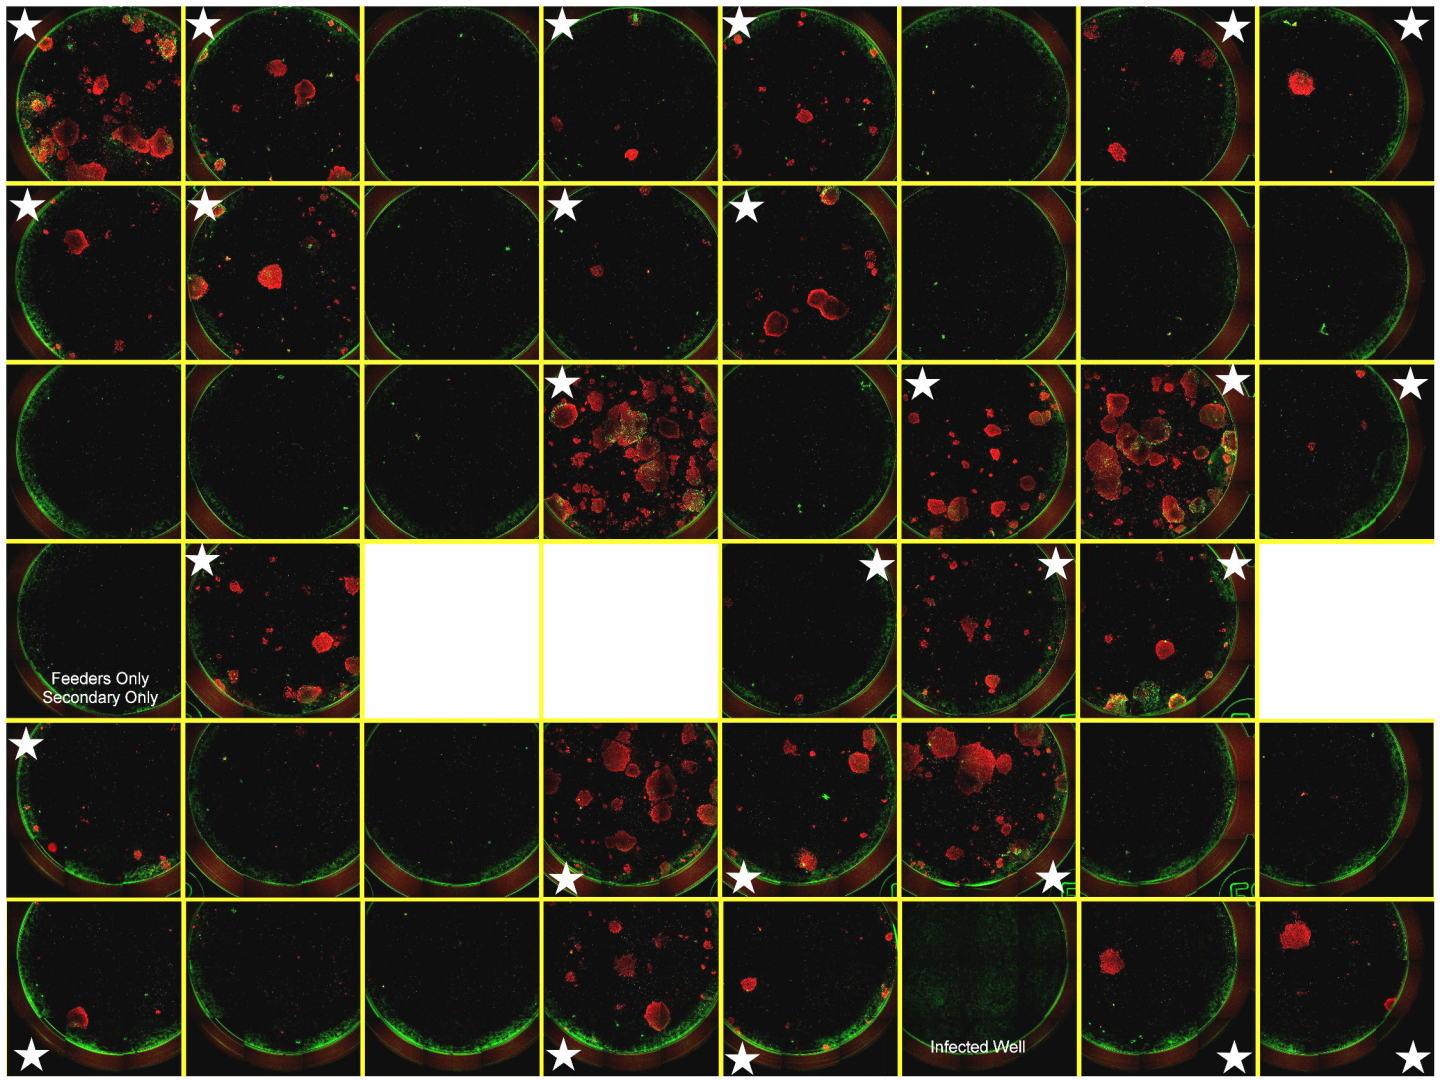

b

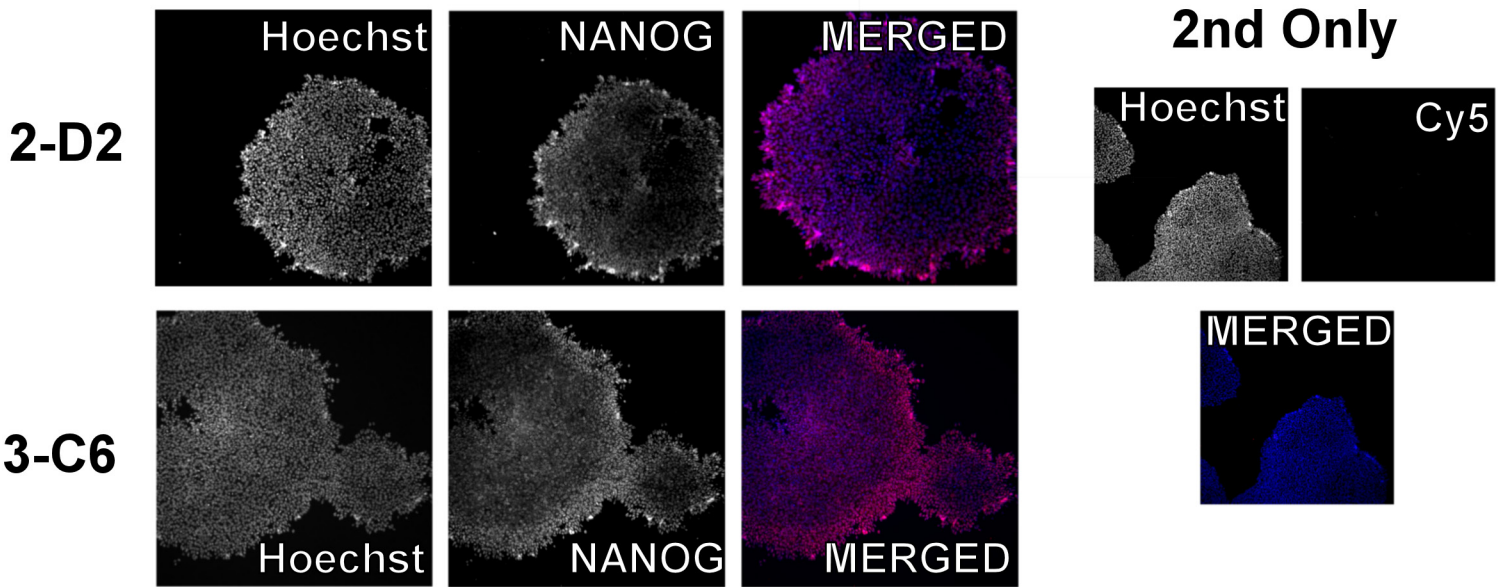

c

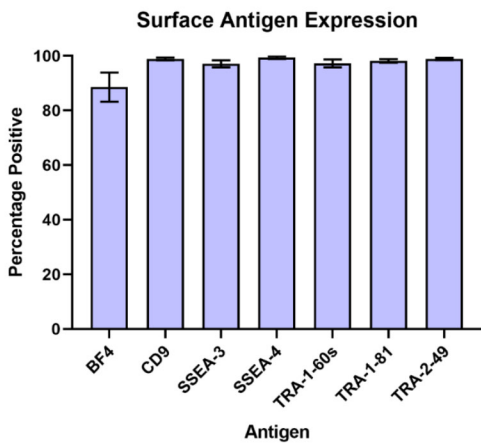

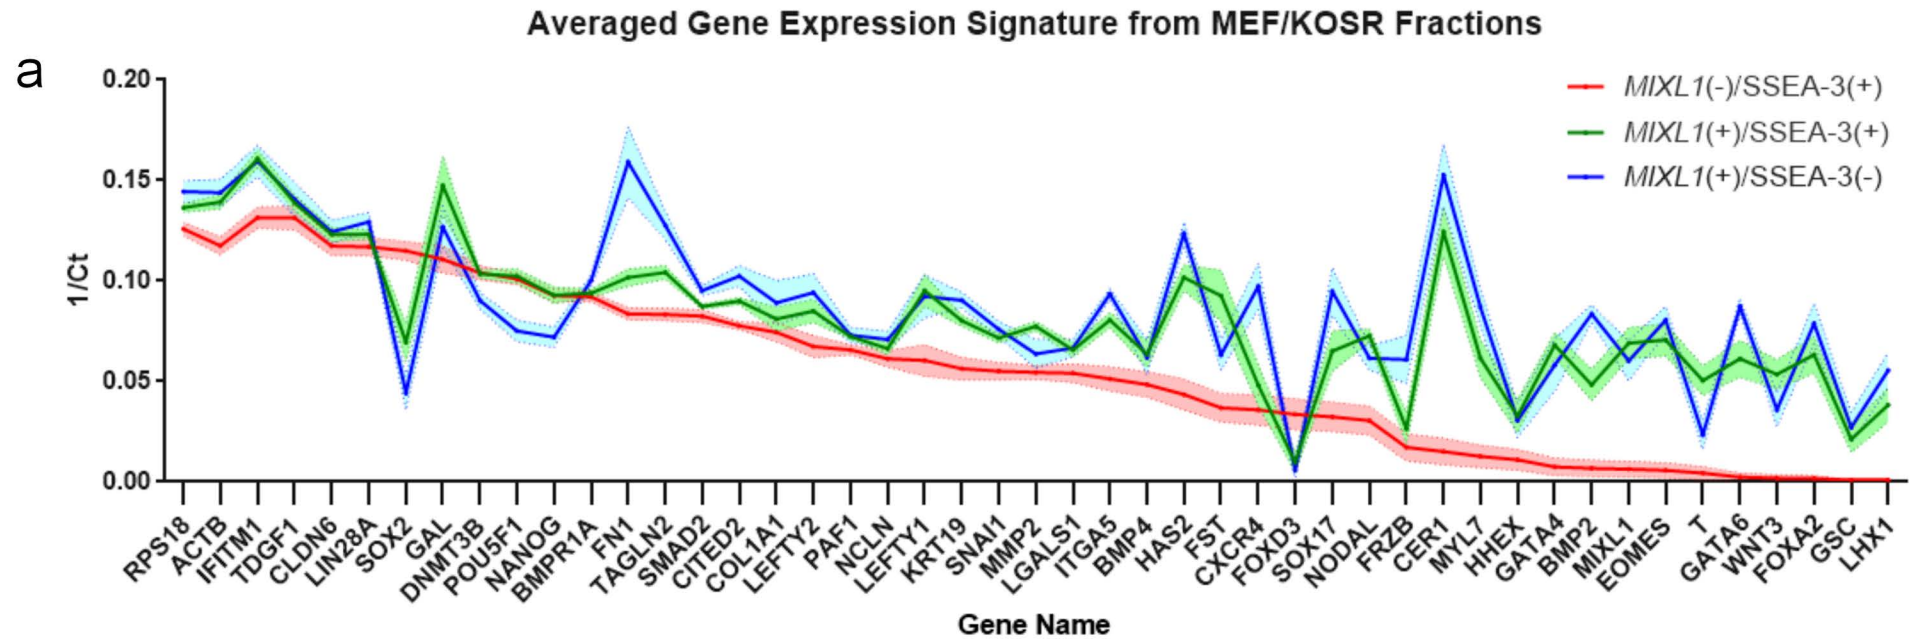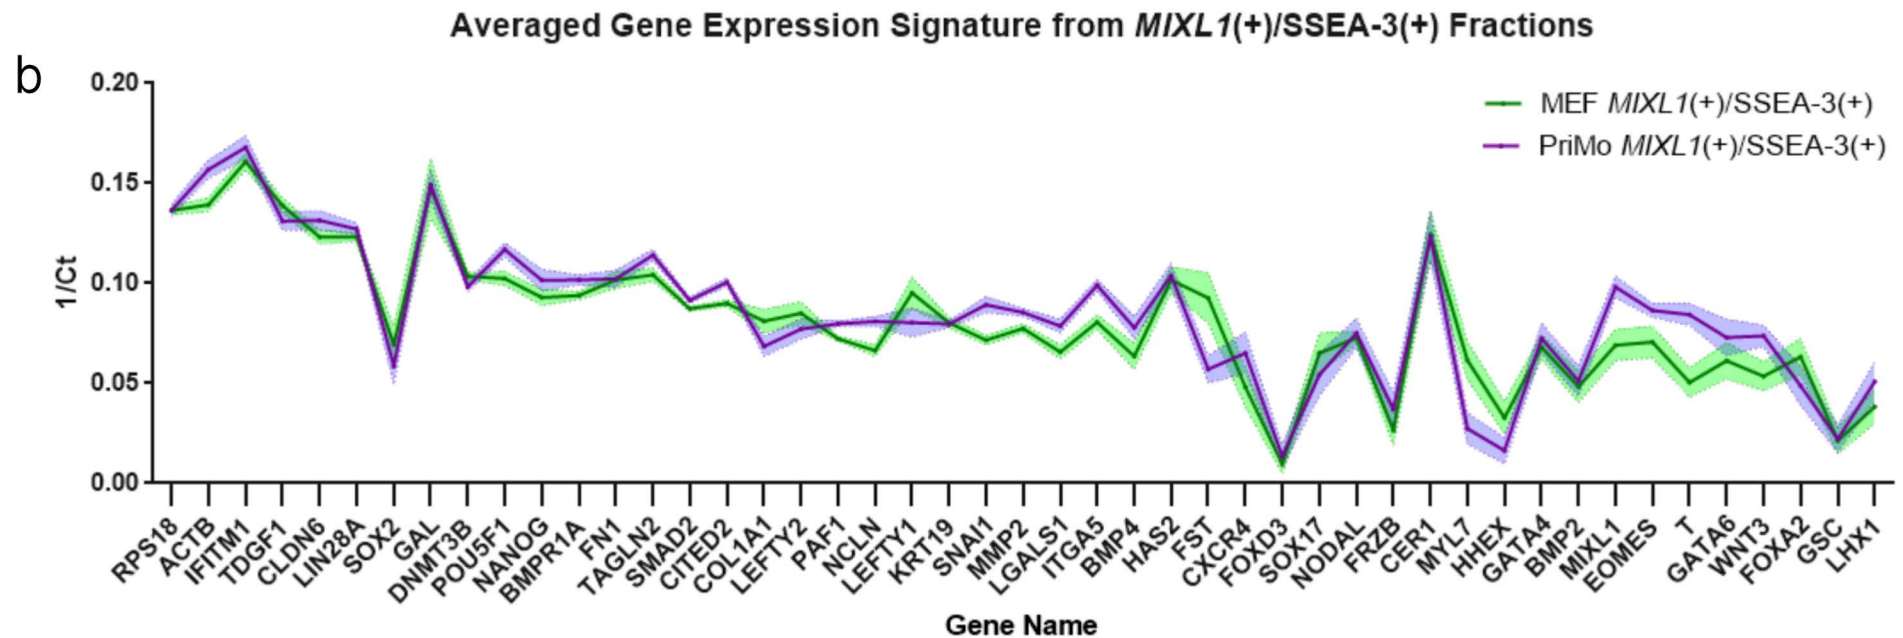

S4. a

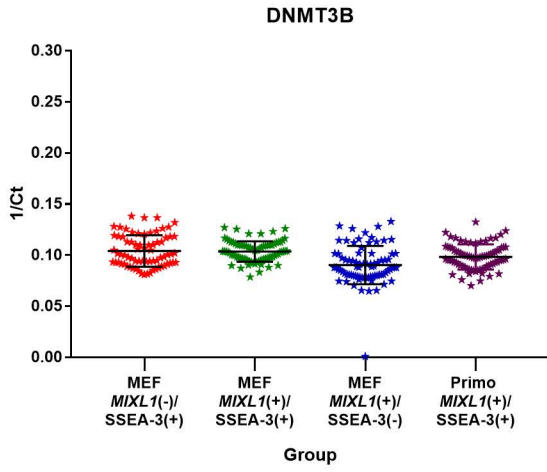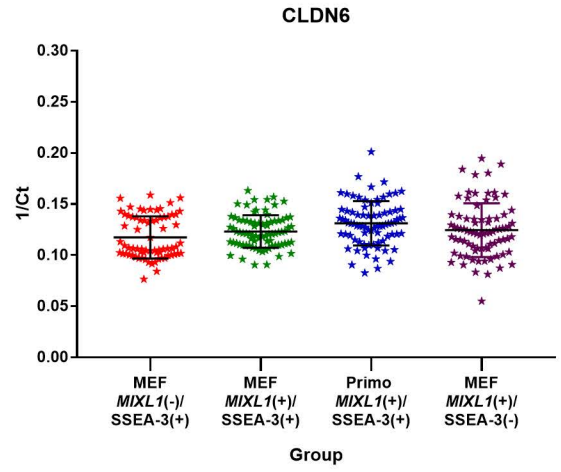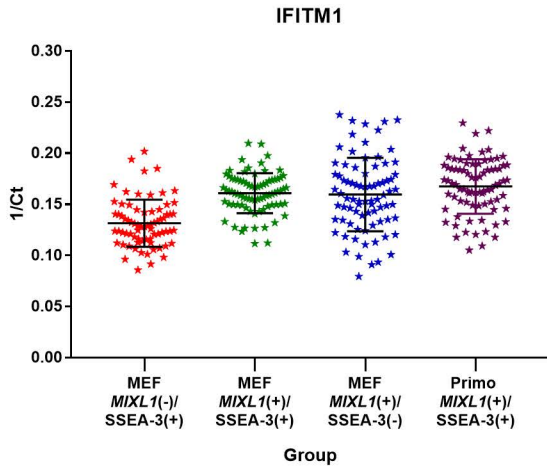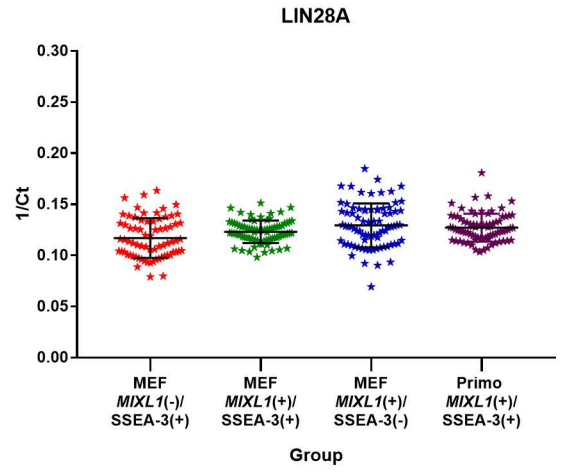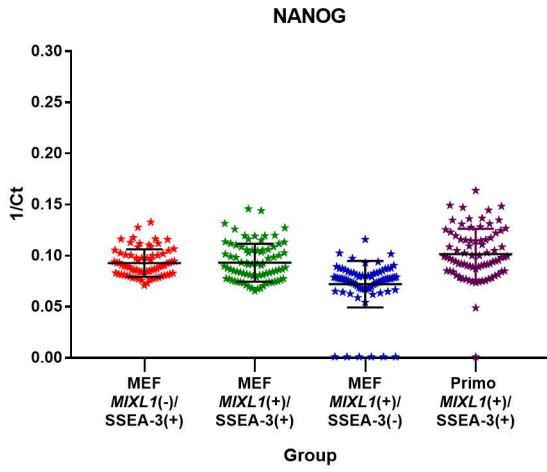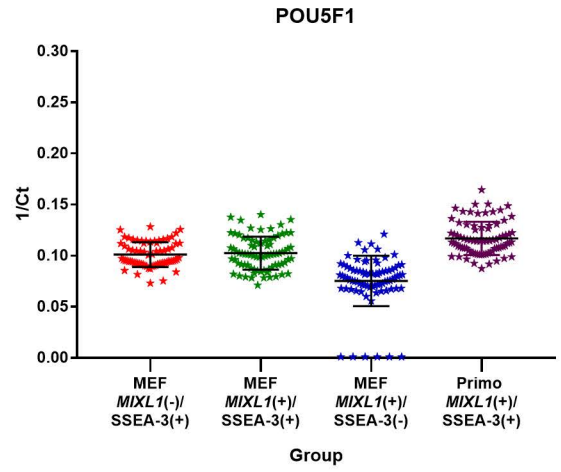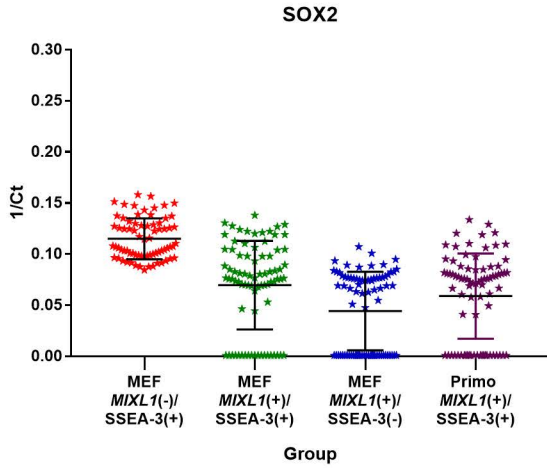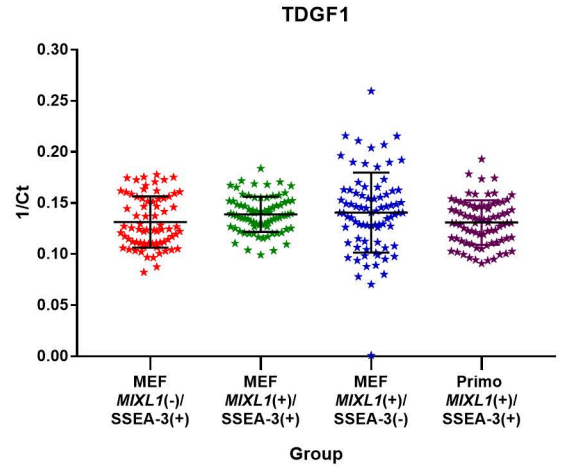



S4. b

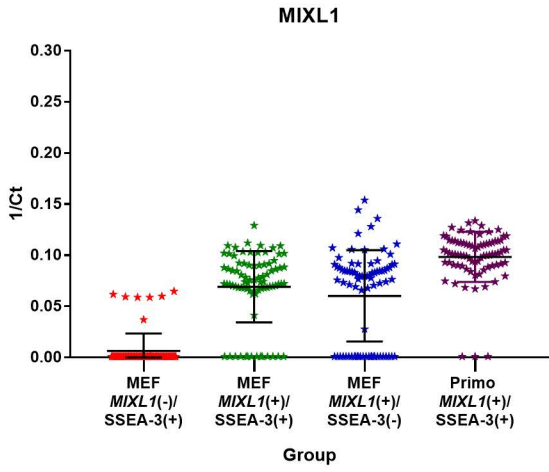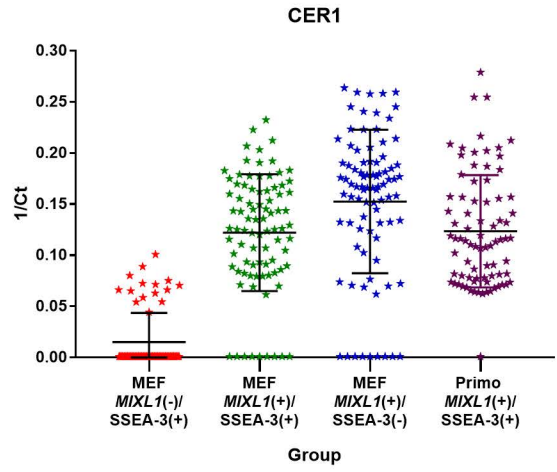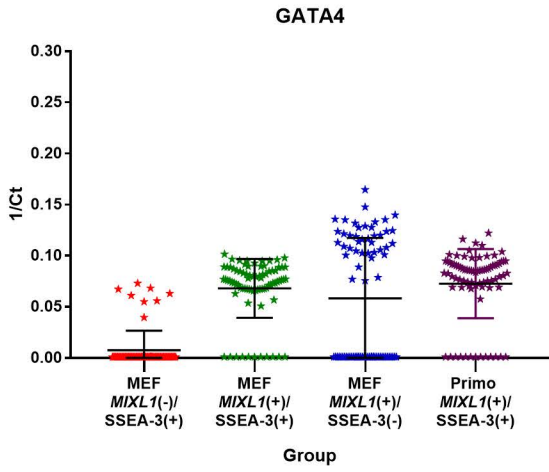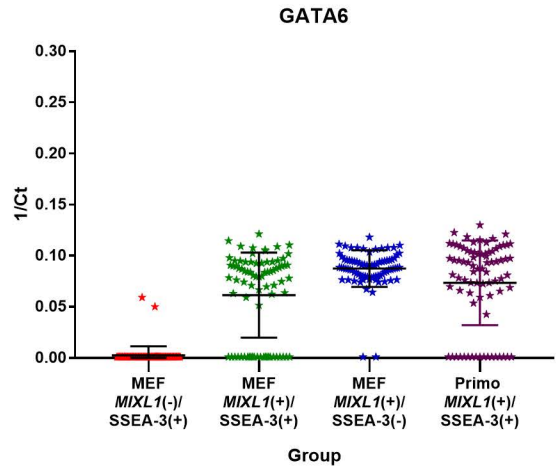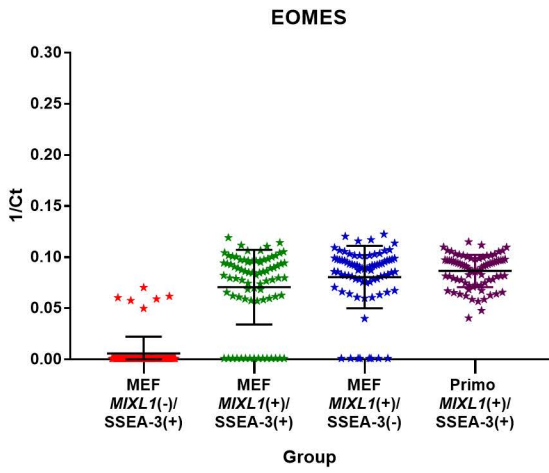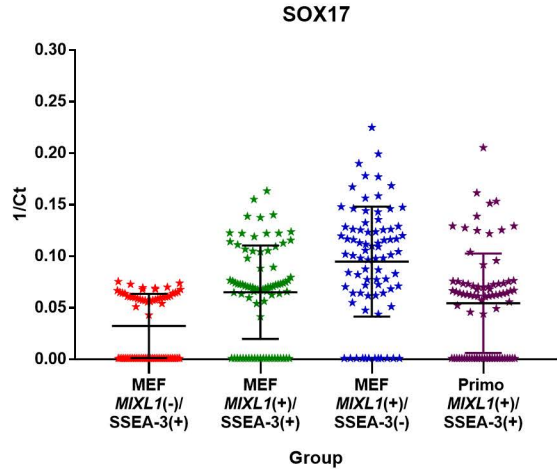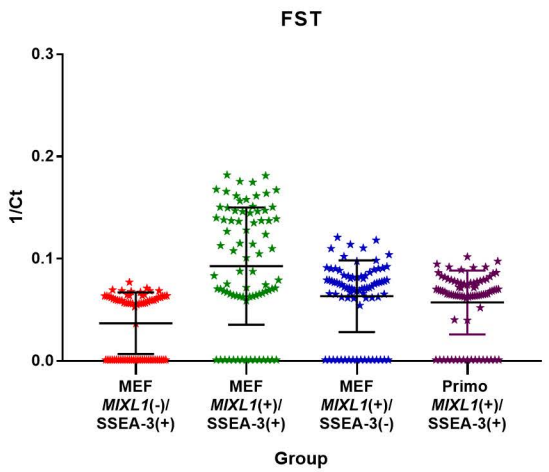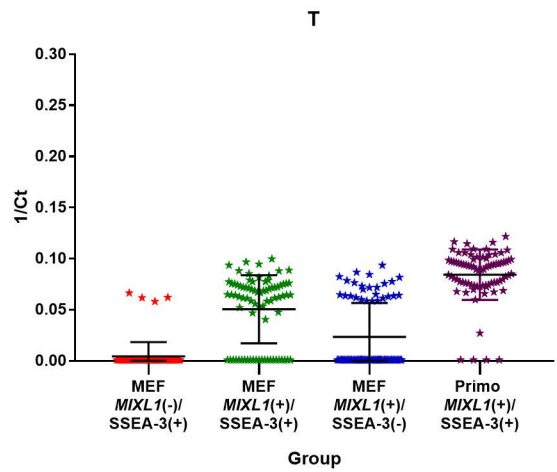

S4. c

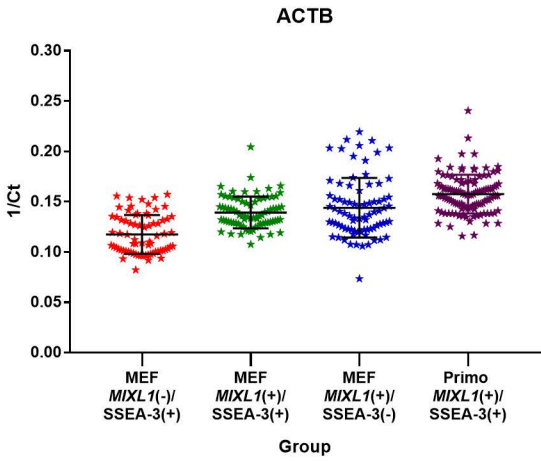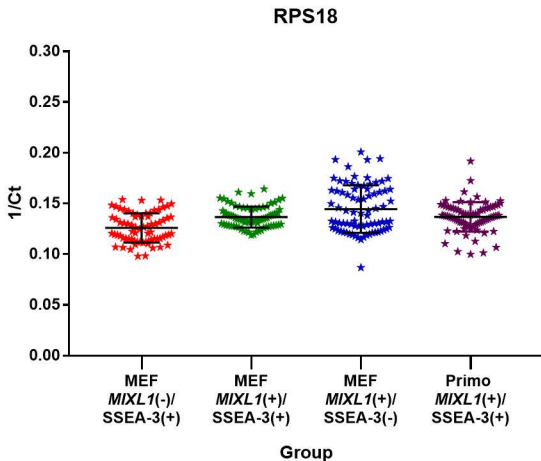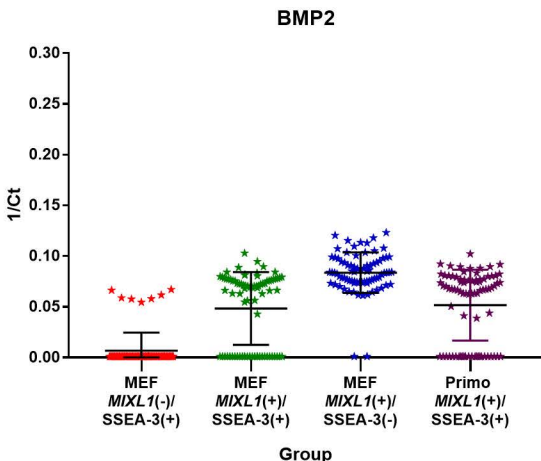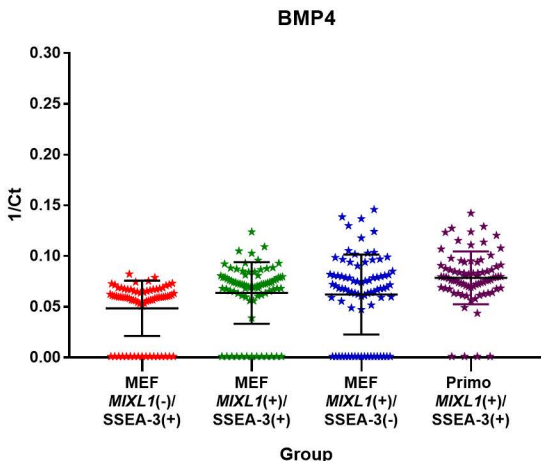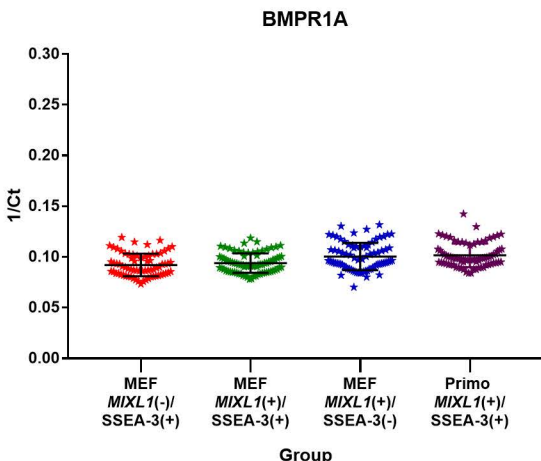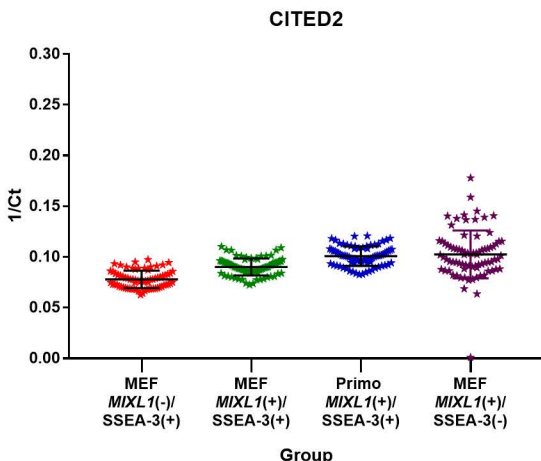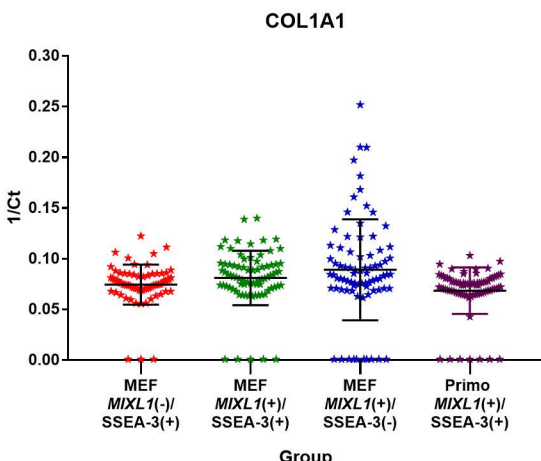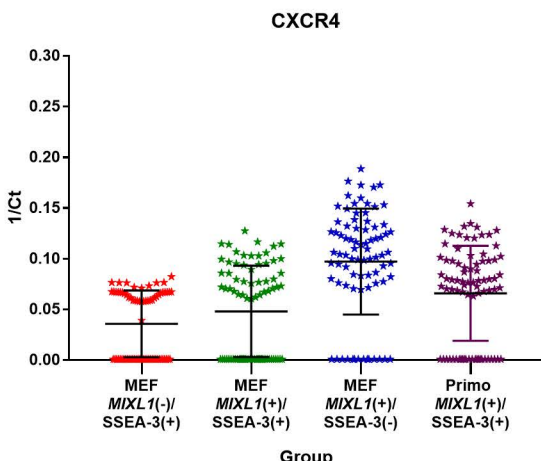

# S4. d

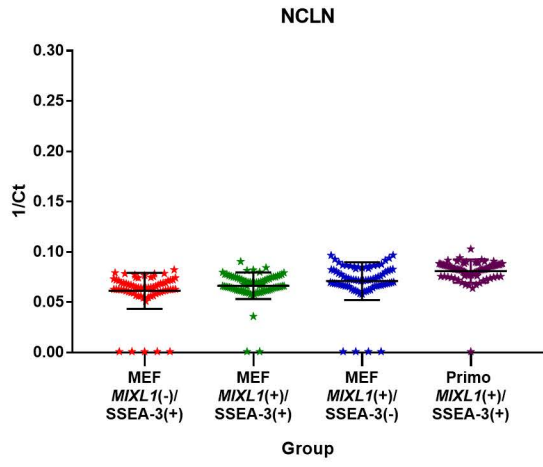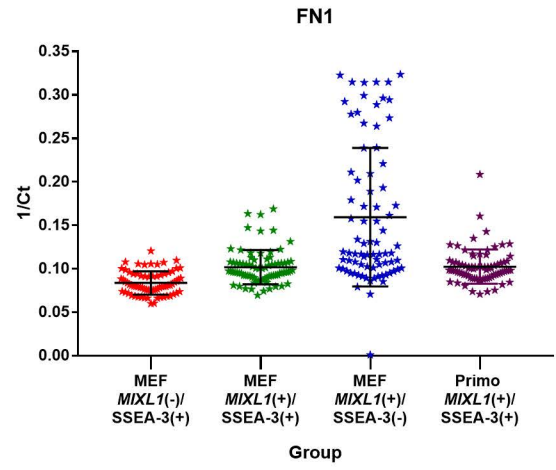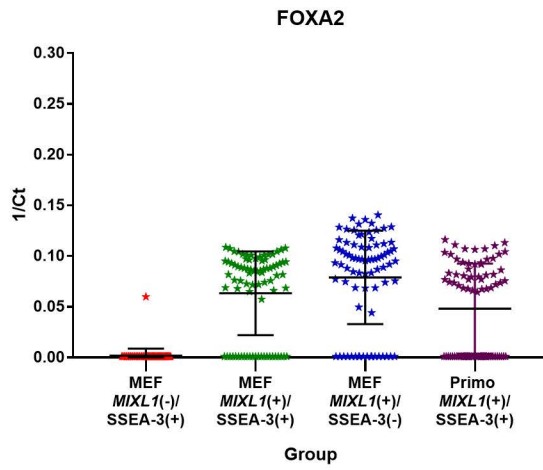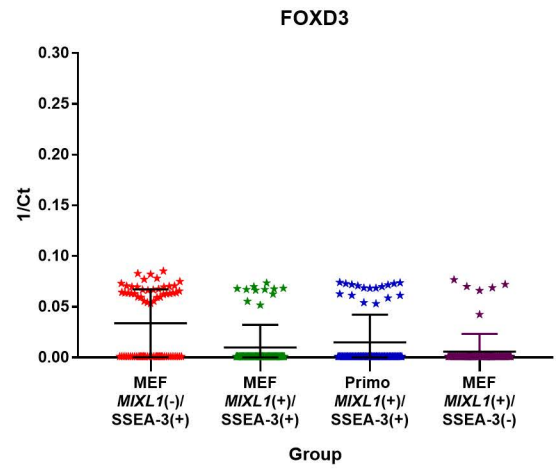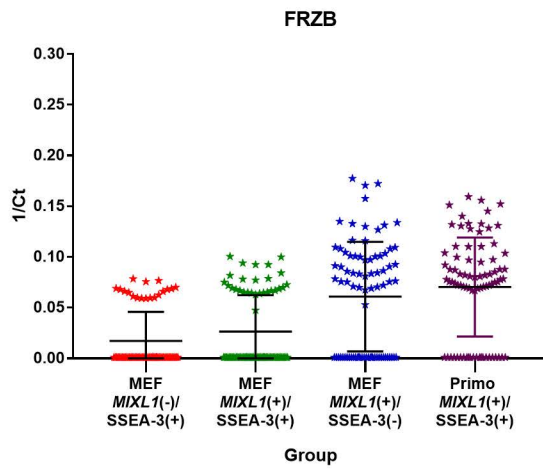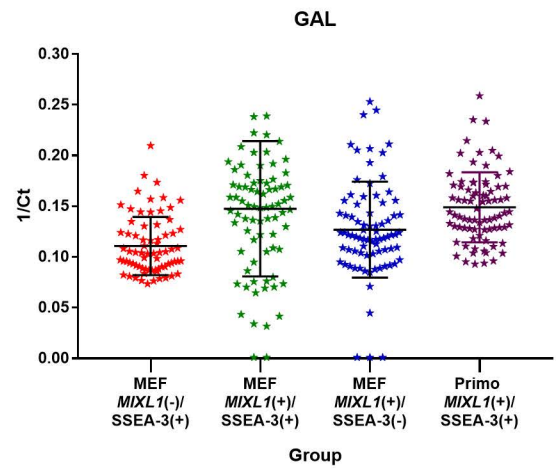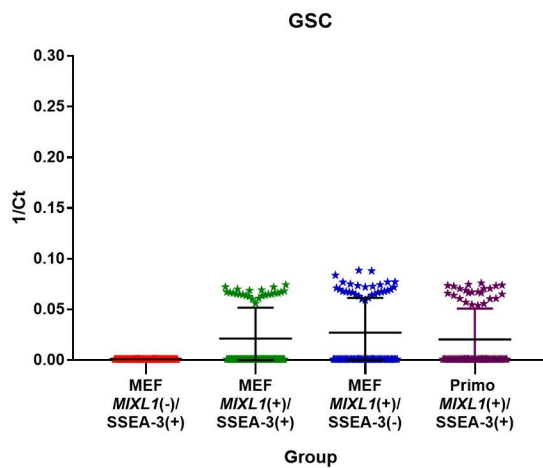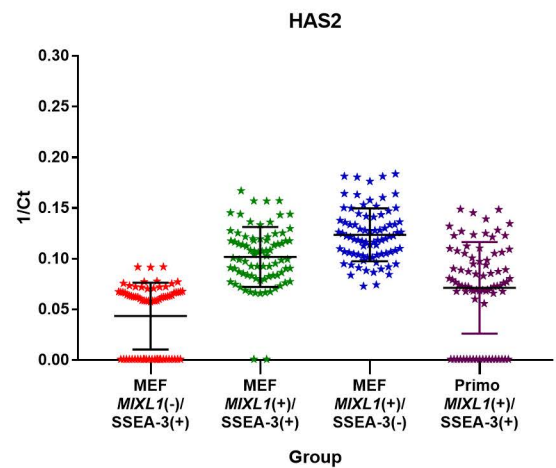

# S4. e

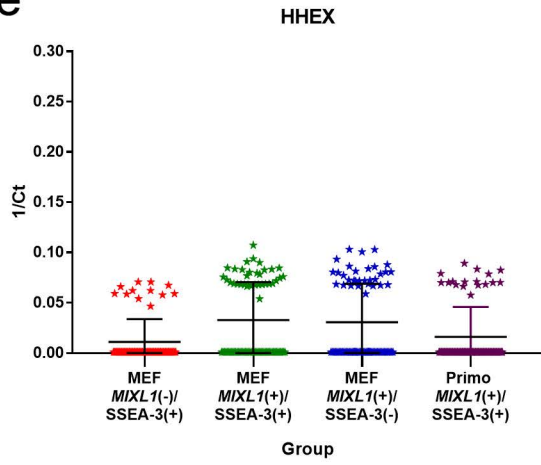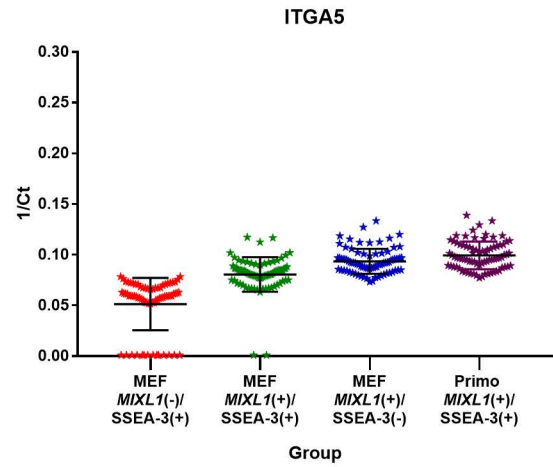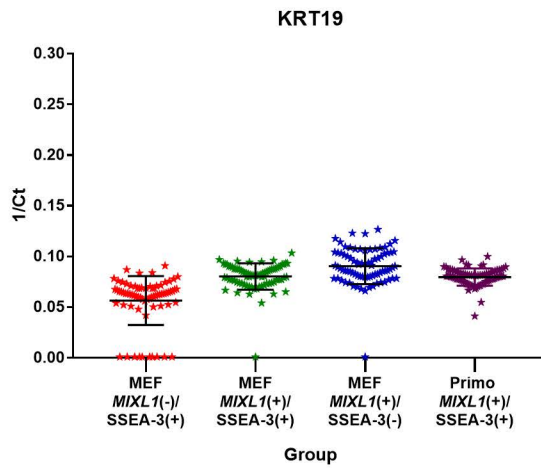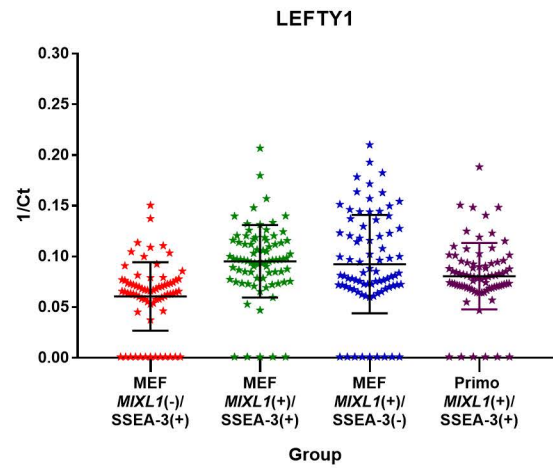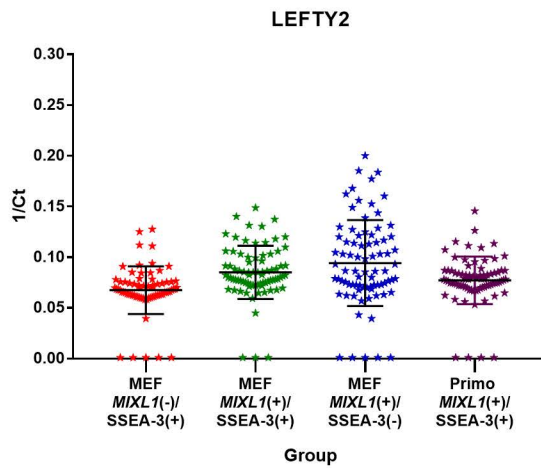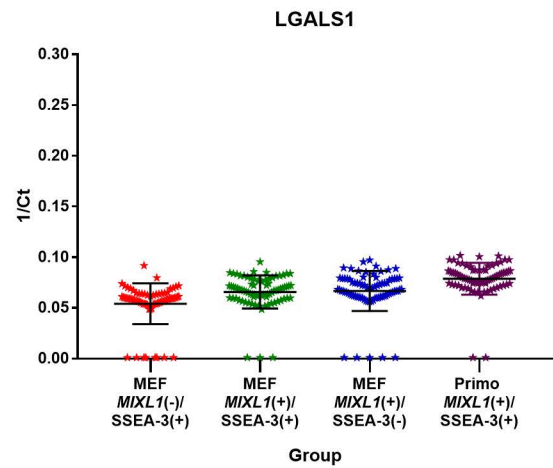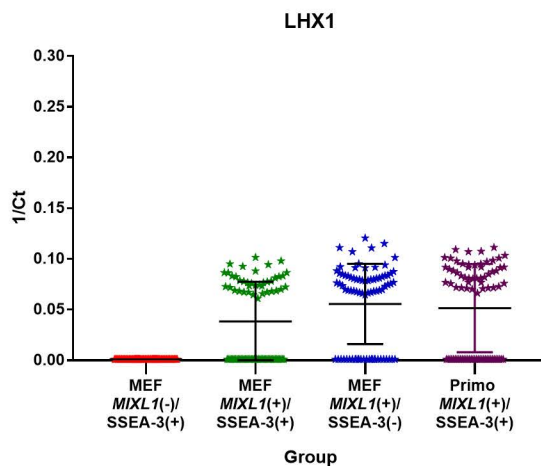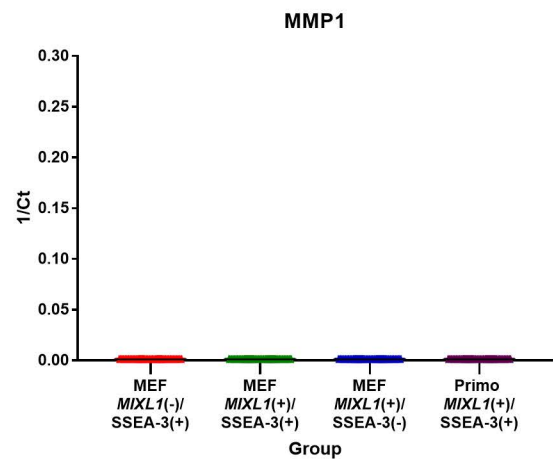

S4. f

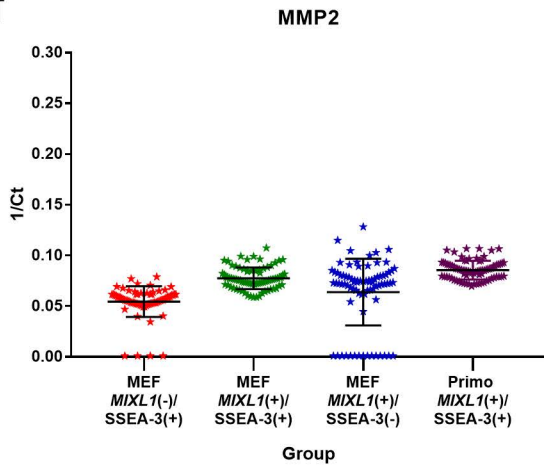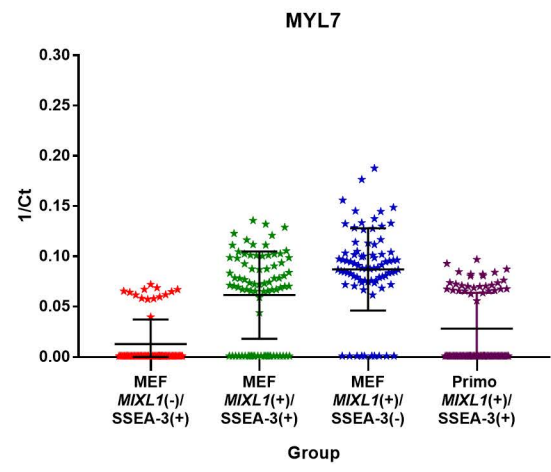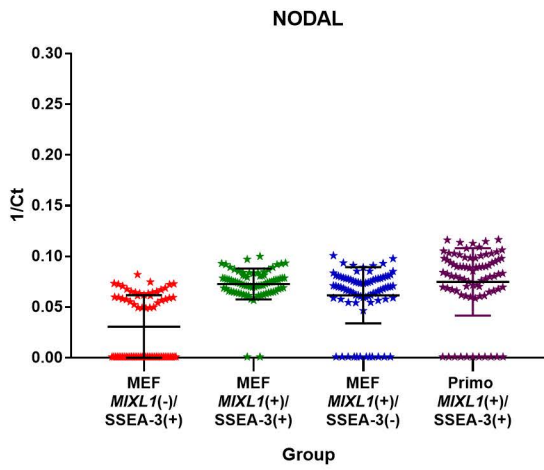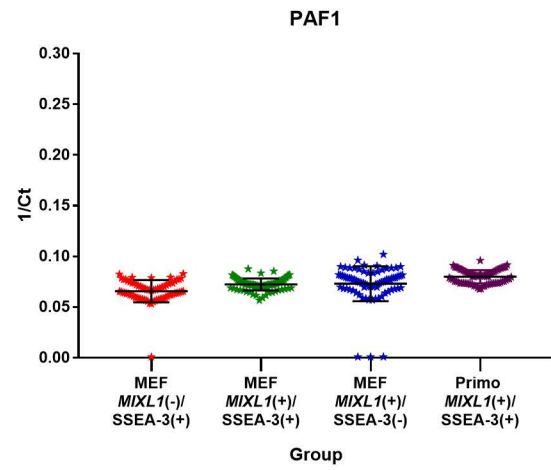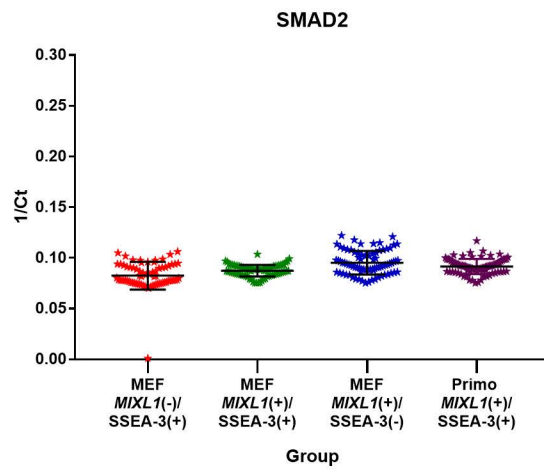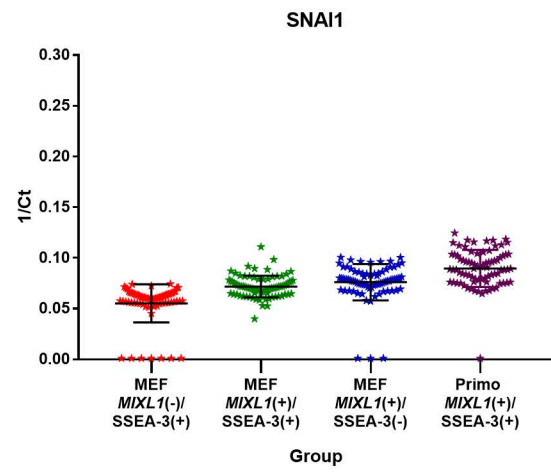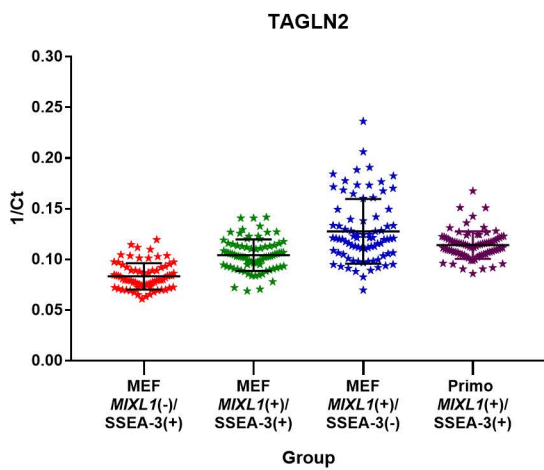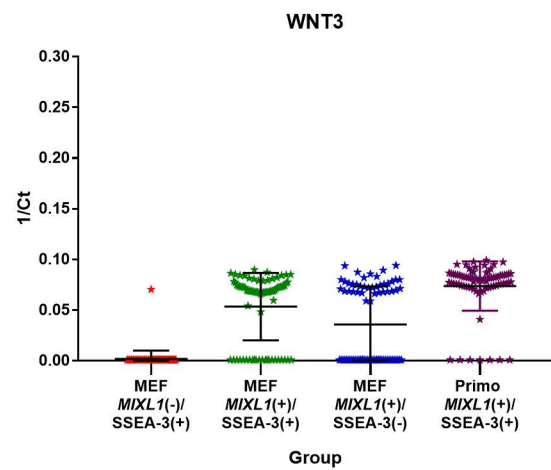

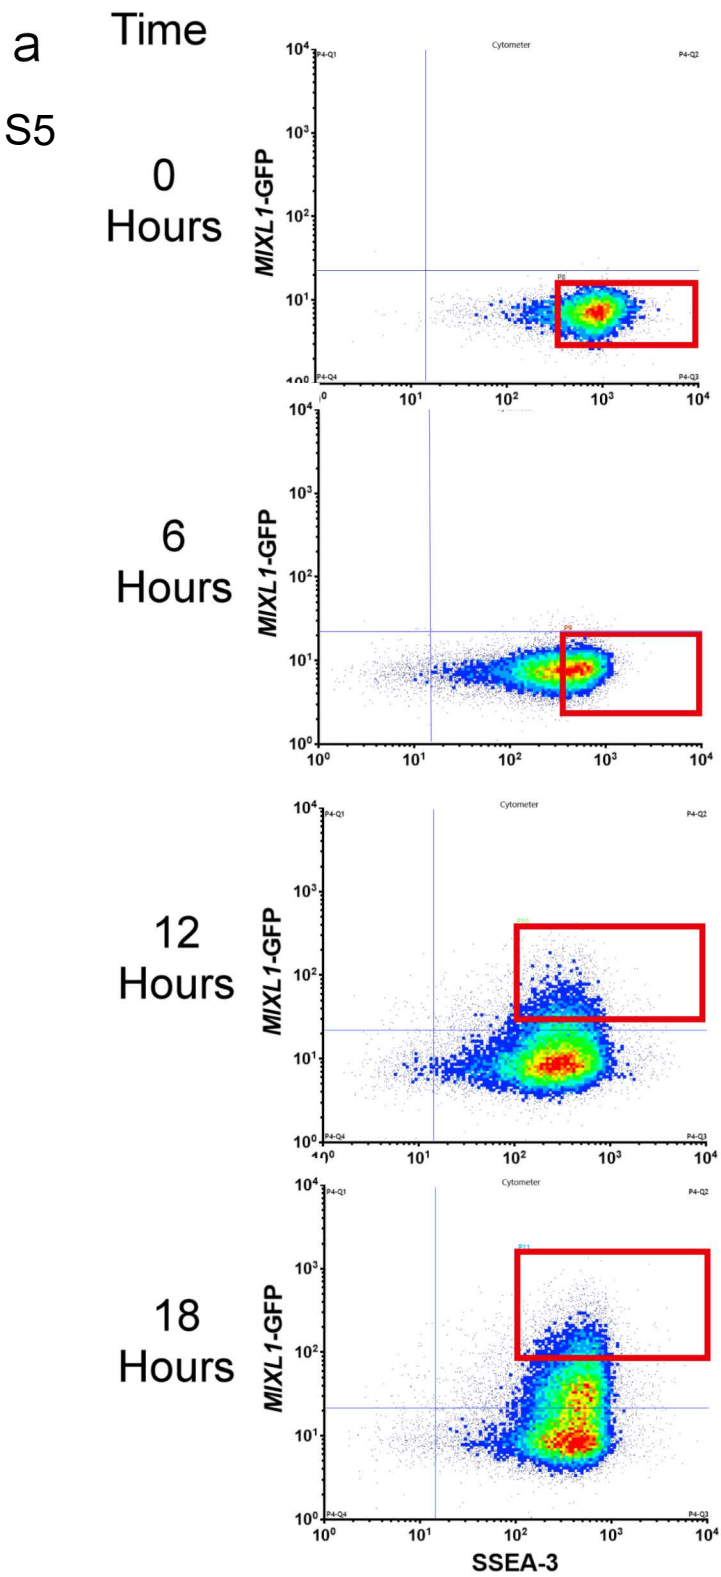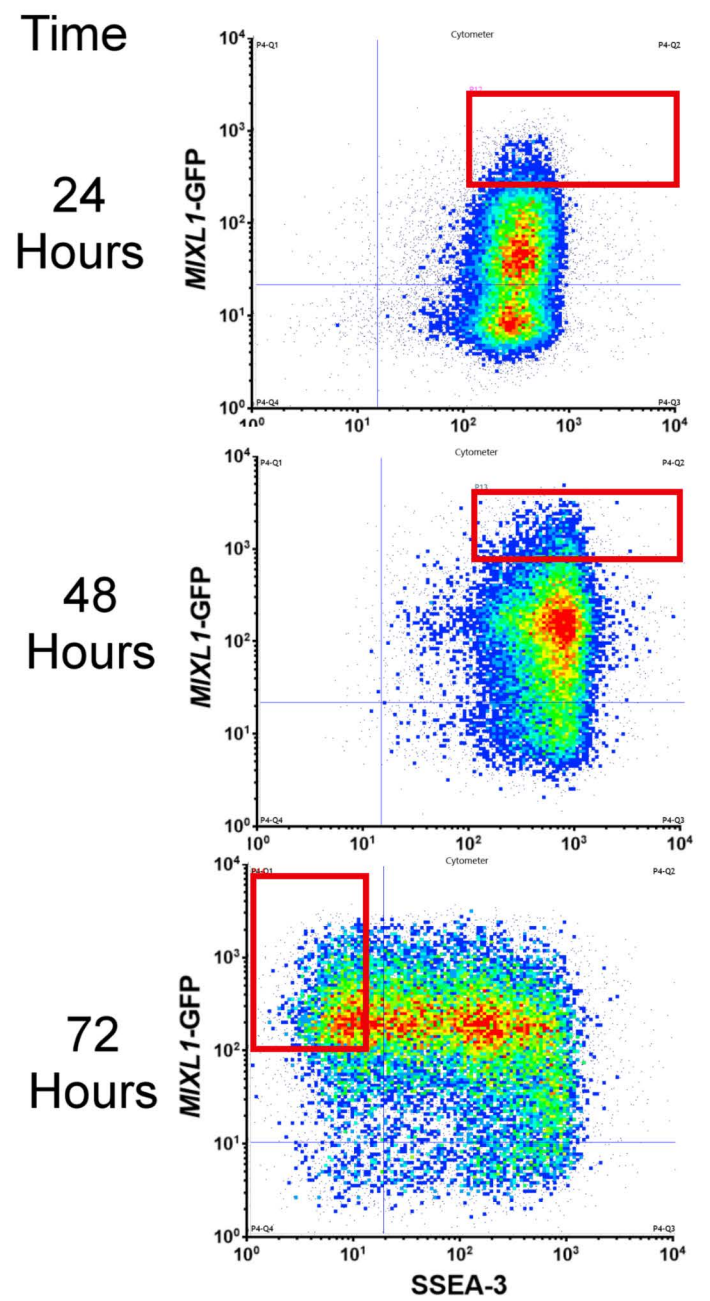

a S6

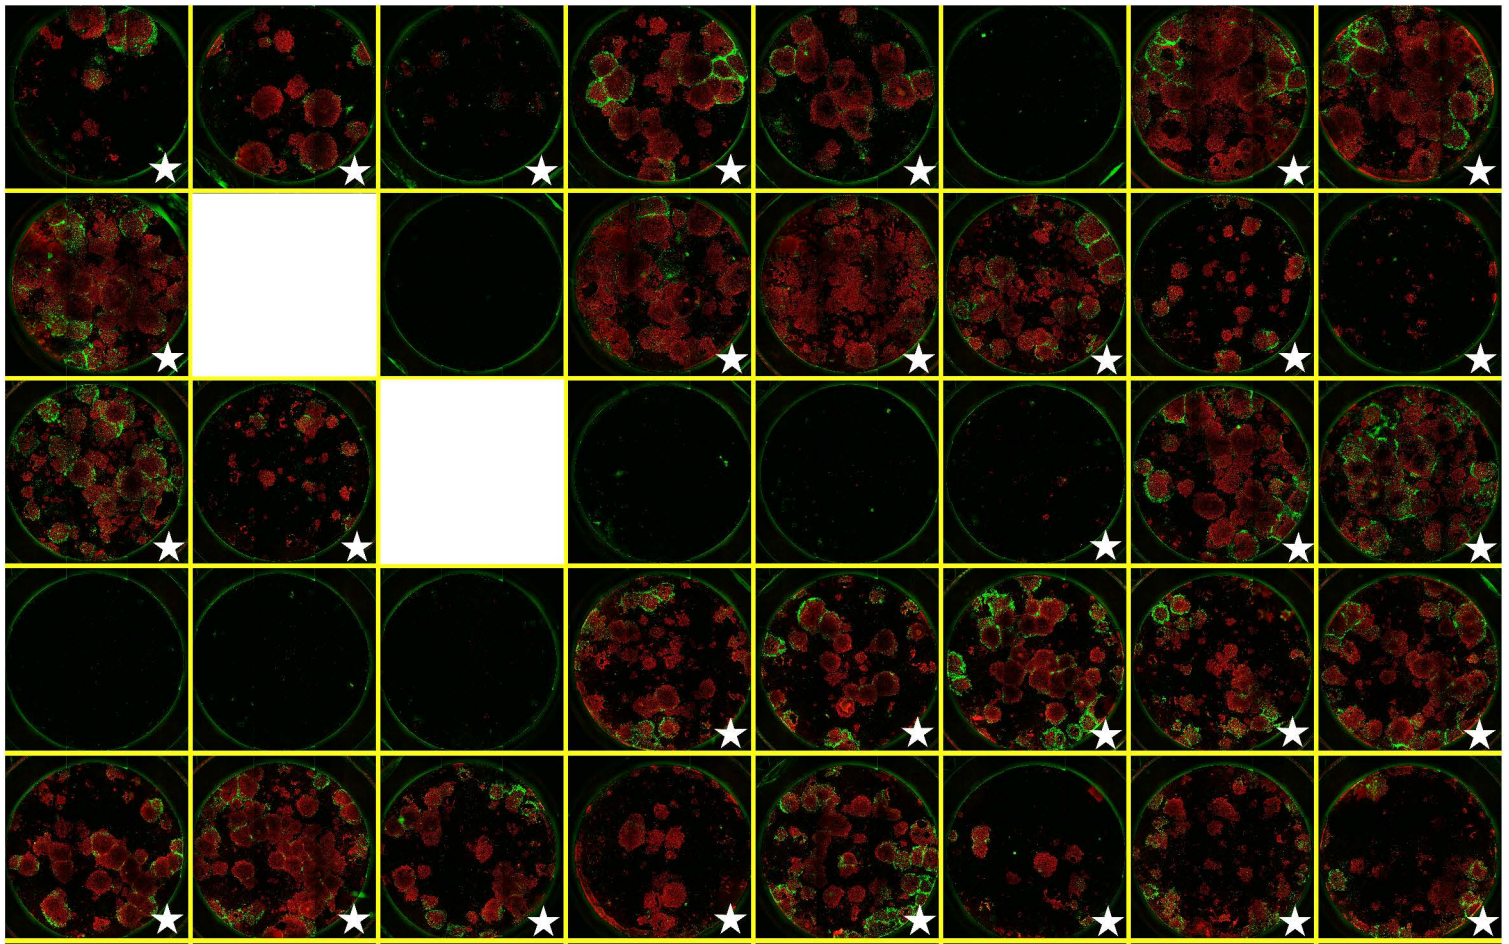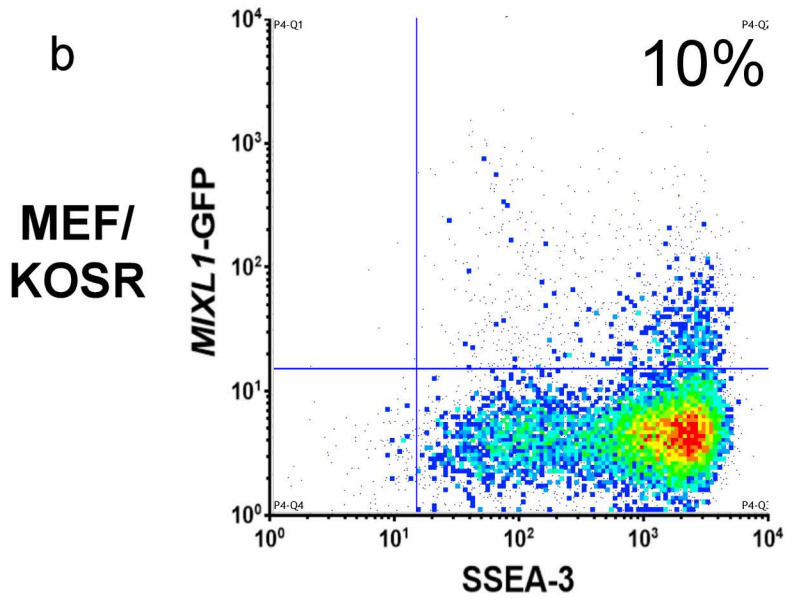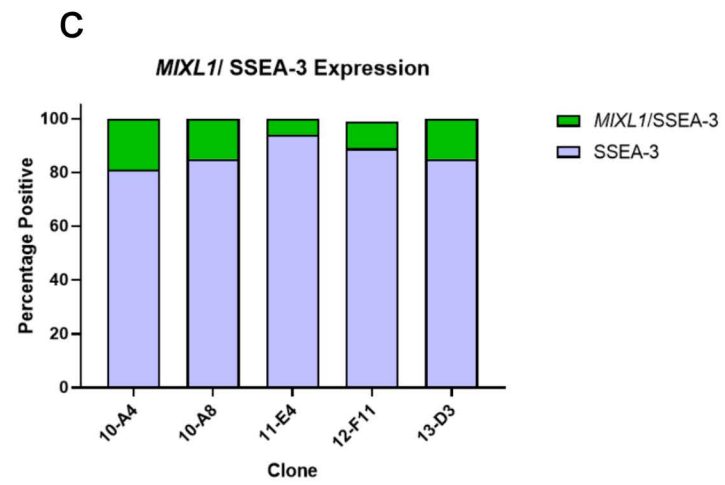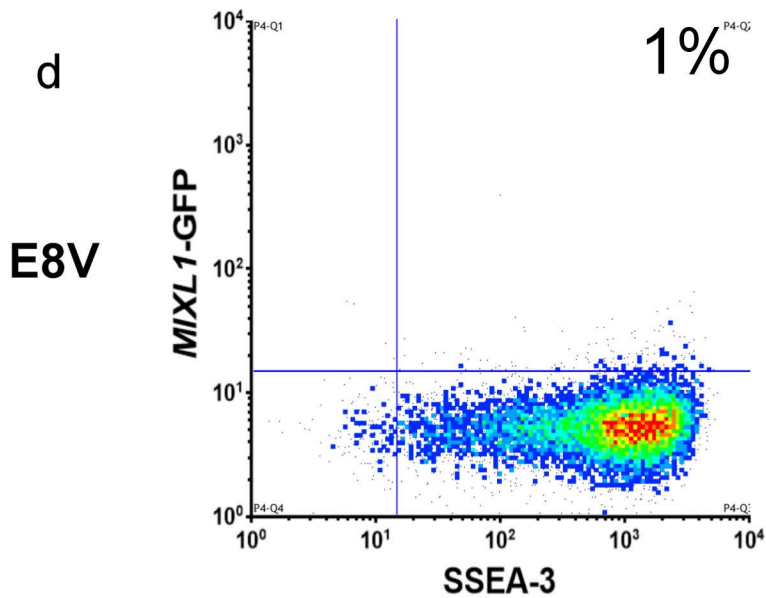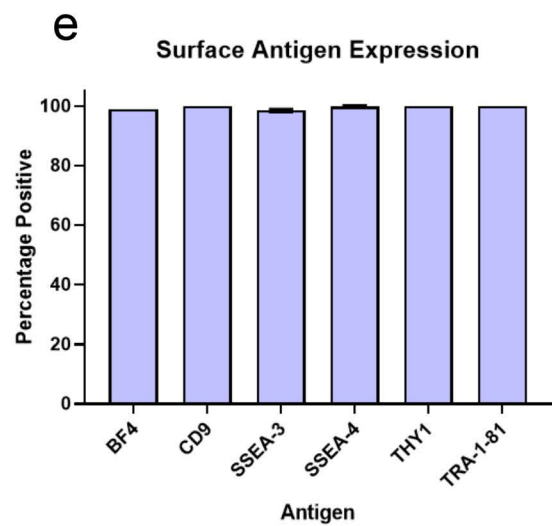

S7

a

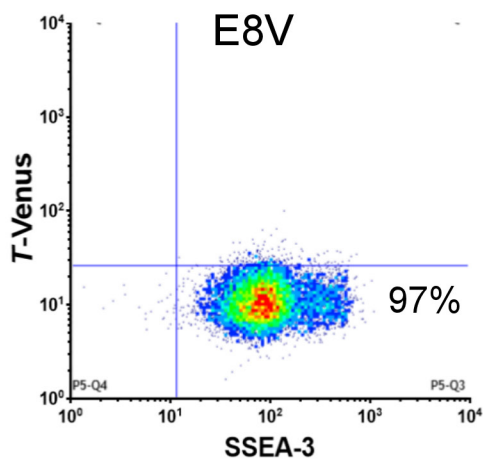

b

IWP2 replaced with DKK1 100ng/mL

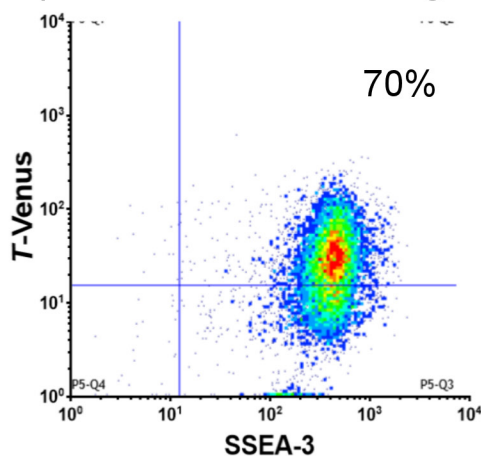

c

CHIR99021 replaced with SB216763 at 10 $\mu$ M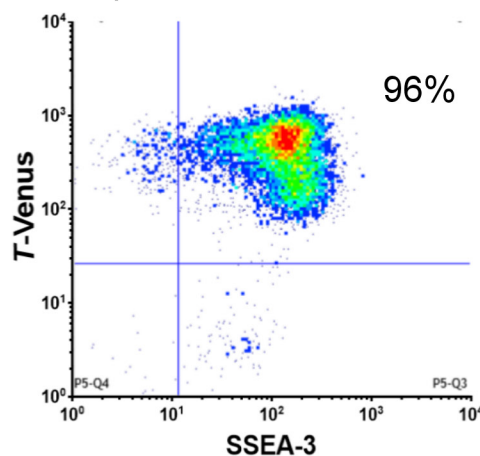

d

LPA replaced with S1P at the concentrations indicated

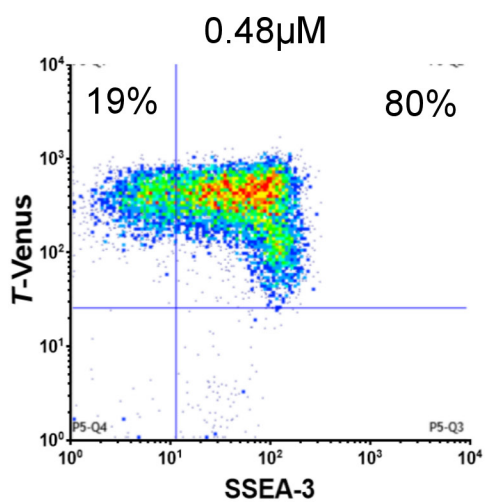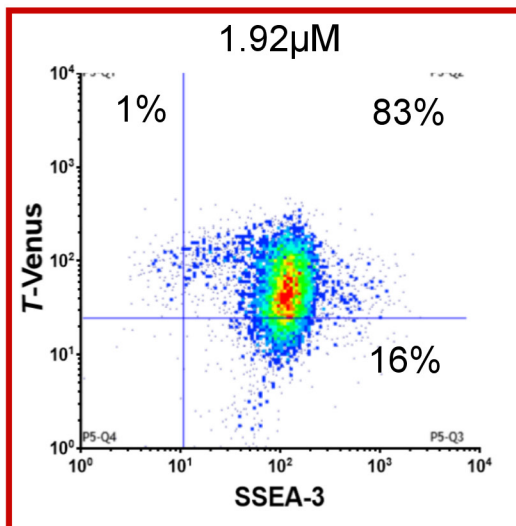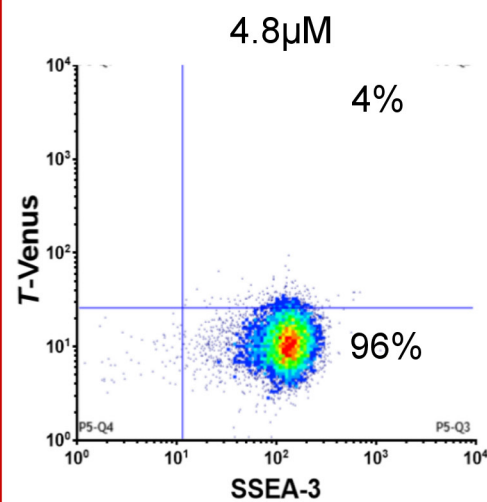

e

LPA replaced with GRI977143 at the concentrations indicated

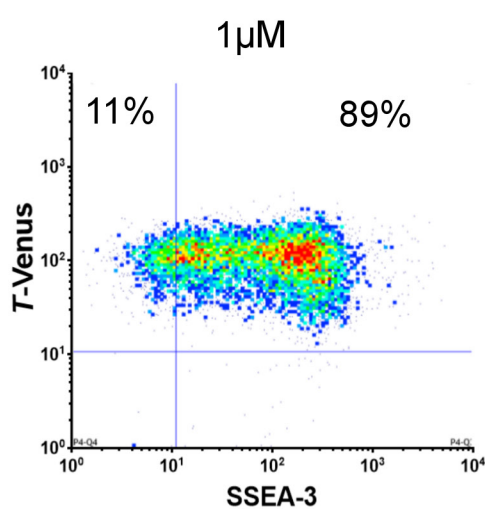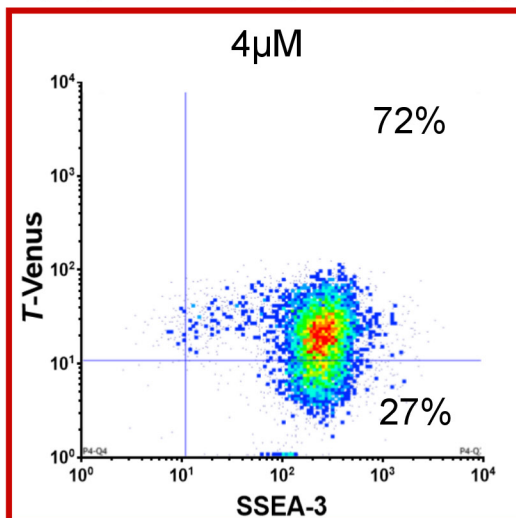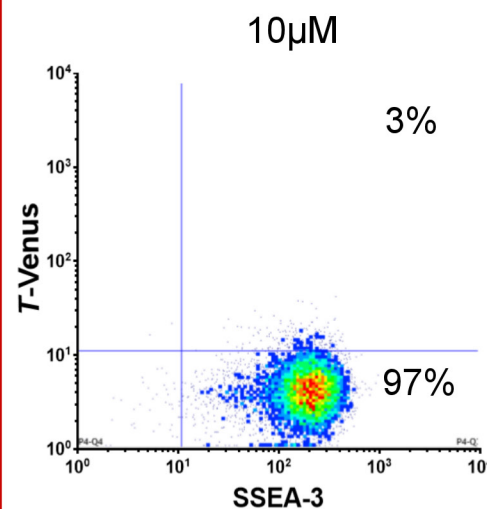



S8

a

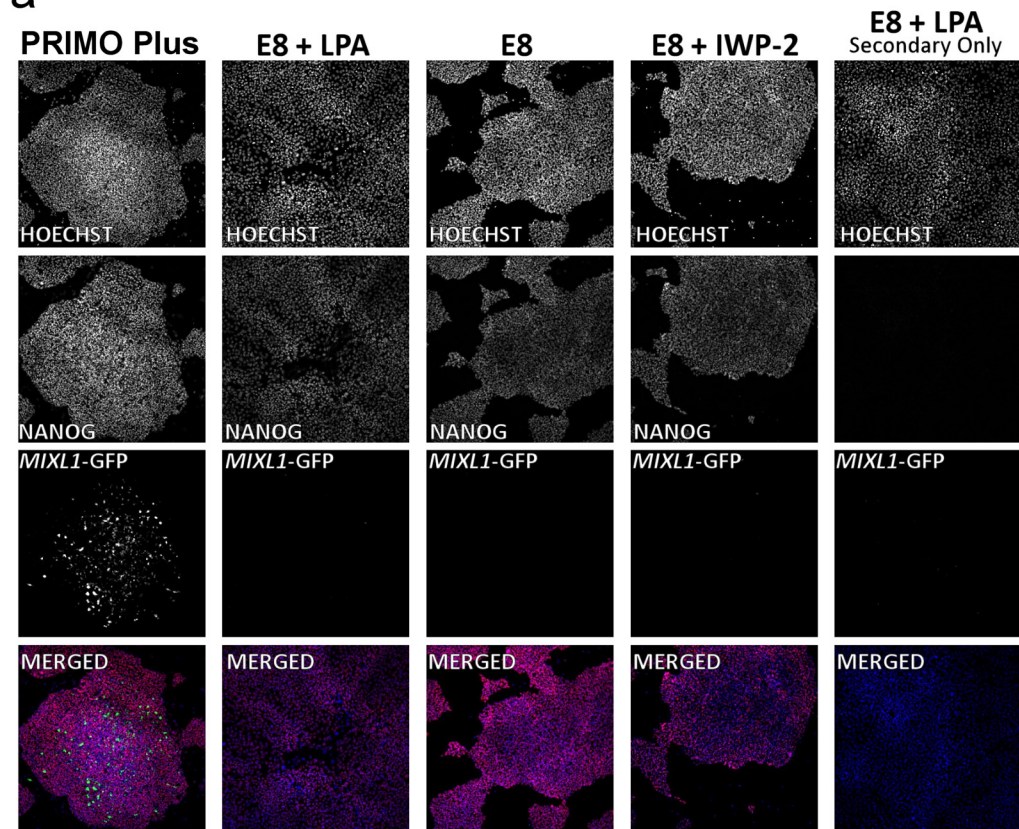

c

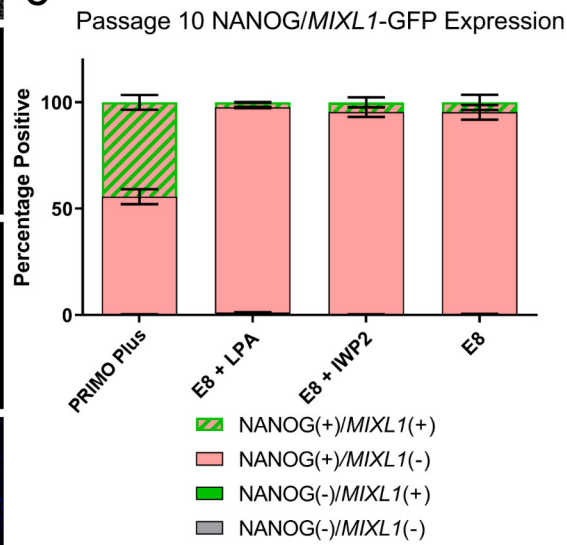

b

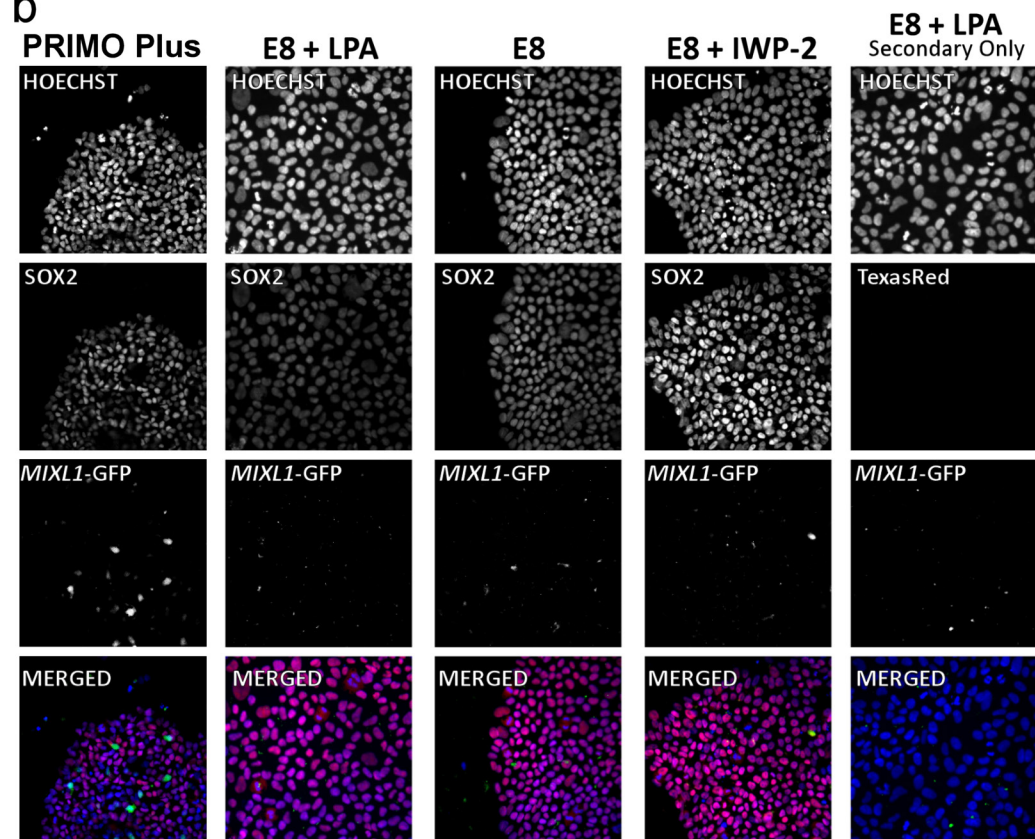

d

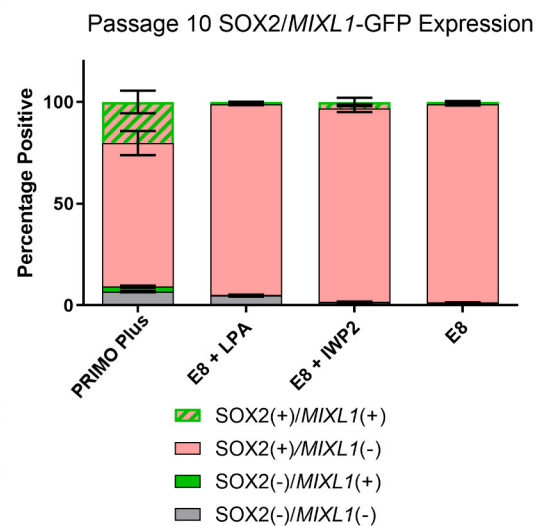

**Table 1 Single Cell qPCR assay list**

| Assay ID      | Gene Symbol   | RefSeq                                                                                    | Amplicon Length | Detects gDNA | Best Coverage |
|---------------|---------------|-------------------------------------------------------------------------------------------|-----------------|--------------|---------------|
| Hs01060665_g1 | <i>ACTB</i>   | NM_001101.3                                                                               | 63              | Yes          | Yes           |
| Hs00154192_m1 | <i>BMP2</i>   | NM_001200.2                                                                               | 60              | No           | Yes           |
| Hs03676628_s1 | <i>BMP4</i>   | NM_130850.2;NM_001202.3;<br>NM_130851.2                                                   | 116             | Yes          | Yes           |
| Hs01034913_g1 | <i>BMPR1A</i> | NM_004329.2                                                                               | 94              | Yes          | Yes           |
| Hs00193796_m1 | <i>CER1</i>   | NM_005454.2                                                                               | 92              | No           | Yes           |
| Hs01897804_s1 | <i>CITED2</i> | NM_001168388.2;NM_00116<br>8389.2;NM_006079.4                                             | 106             | Yes          | Yes           |
| Hs00607528_s1 | <i>CLDN6</i>  | NM_021195.4                                                                               | 154             | Yes          | Yes           |
| Hs00164004_m1 | <i>COL1A1</i> | NM_000088.3                                                                               | 66              | No           | Yes           |
| Hs00976734_m1 | <i>CXCR4</i>  | NM_003467.2;NM_00100854<br>0.1                                                            | 153             | No           | No            |
| Hs00171876_m1 | <i>DNMT3B</i> | NM_001207055.1;NM_00120<br>7056.1;NM_175848.1;NM_17<br>5849.1;NM_175850.2;NM_00<br>6892.3 | 55              | No           | Yes           |
| Hs00172872_m1 | <i>EOMES</i>  | NM_001278183.1;NM_00127<br>8182.1;NM_005442.3                                             | 81              | No           | Yes           |
| Hs01549976_m1 | <i>FN1</i>    | NM_212482.1;NM_054034.2;<br>NM_002026.2;NM_212478.1;<br>NM_212474.1;NM_212476.1           | 81              | No           | Yes           |
| Hs00232764_m1 | <i>FOXA2</i>  | NM_021784.4;NM_153675.2                                                                   | 66              | No           | Yes           |
| Hs00255287_s1 | <i>FOXD3</i>  | NM_012183.2                                                                               | 78              | Yes          | Yes           |
| Hs00173503_m1 | <i>FRZB</i>   | NM_001463.3                                                                               | 108             | No           | Yes           |
| Hs00246256_m1 | <i>FST</i>    | NM_006350.3;NM_013409.2                                                                   | 108             | No           | No            |
| Hs00544355_m1 | <i>GAL</i>    | NM_015973.3                                                                               | 125             | No           | Yes           |
| Hs00171403_m1 | <i>GATA4</i>  | NM_002052.3                                                                               | 68              | No           | Yes           |
| Hs00232018_m1 | <i>GATA6</i>  | NM_005257.4                                                                               | 91              | No           | Yes           |
| Hs00906630_g1 | <i>GSC</i>    | NM_173849.2                                                                               | 100             | No           | No            |
| Hs00193435_m1 | <i>HAS2</i>   | NM_005328.2                                                                               | 63              | No           | Yes           |
| Hs00242160_m1 | <i>HHEX</i>   | NM_002729.4                                                                               | 110             | Yes          | Yes           |
| Hs00705137_s1 | <i>IFITM1</i> | NM_003641.3                                                                               | 93              | Yes          | Yes           |
| Hs01547673_m1 | <i>ITGA5</i>  | NM_002205.2                                                                               | 54              | No           | Yes           |
| Hs00761767_s1 | <i>KRT19</i>  | NM_002276.4                                                                               | 116             | Yes          | Yes           |
| Hs00764128_s1 | <i>LEFTY1</i> | NM_020997.3                                                                               | 136             | Yes          | Yes           |
| Hs00745761_s1 | <i>LEFTY2</i> | NM_001172425.1;NM_00324<br>0.3                                                            | 102             | Yes          | Yes           |
| Hs00355202_m1 | <i>LGALS1</i> | NM_002305.3                                                                               | 63              | No           | Yes           |
| Hs00232144_m1 | <i>LHX1</i>   | NM_005568.3                                                                               | 60              | No           | Yes           |
| Hs00702808_s1 | <i>LIN28A</i> | NM_024674.4                                                                               | 143             | Yes          | Yes           |
| Hs00430824_g1 | <i>MIXL1</i>  | NM_031944.1                                                                               | 152             | No           | No            |
| Hs00899658_m1 | <i>MMP1</i>   | NM_001145938.1;NM_00242<br>1.3                                                            | 64              | No           | Yes           |

| Assay ID      | Gene Symbol   | RefSeq                                    | Amplicon Length | Detects gDNA | Best Coverage |
|---------------|---------------|-------------------------------------------|-----------------|--------------|---------------|
| Hs01548727_m1 | <i>MMP2</i>   | NM_004530.4;NM_001127891.1                | 65              | No           | Yes           |
| Hs01085598_g1 | <i>MYL7</i>   | NM_021223.2                               | 74              | No           | Yes           |
| Hs04399610_g1 | <i>NANOG</i>  | NM_024865.2                               | 101             | Yes          | No            |
| Hs00378379_m1 | <i>NCLN</i>   | NM_020170.3                               | 65              | No           | Yes           |
| Hs00415443_m1 | <i>NODAL</i>  | NM_018055.4                               | 68              | No           | Yes           |
| Hs00219496_m1 | <i>PAF1</i>   | NM_019088.3;NM_001256826.1                | 100             | No           | Yes           |
| Hs04260367_gH | <i>POU5F1</i> | NM_001173531.1;NM_002701.4;NM_203289.4    | 77              | Yes          | Yes           |
| Hs01375212_g1 | <i>RPS18</i>  | NM_022551.2                               | 93              | Yes          | Yes           |
| Hs00183425_m1 | <i>SMAD2</i>  | NM_001135937.2;NM_001003652.3;NM_005901.5 | 129             | No           | No            |
| Hs00195591_m1 | <i>SNAI1</i>  | NM_005985.3                               | 66              | Yes          | Yes           |
| Hs00751752_s1 | <i>SOX17</i>  | NM_022454.3                               | 149             | Yes          | Yes           |
| Hs01053049_s1 | <i>SOX2</i>   | NM_003106.3                               | 91              | Yes          | Yes           |
| Hs00610080_m1 | <i>T</i>      | NM_001270484.1;NM_003181.3                | 132             | No           | Yes           |
| Hs00761239_s1 | <i>TAGLN2</i> | NM_001277224.1;NM_001277223.1;NM_003564.2 | 163             | No           | Yes           |
| Hs02339499_g1 | <i>TDGF1</i>  | NM_003212.3;NM_001174136.1                | 170             | Yes          | No            |
| Hs00902257_m1 | <i>WNT3</i>   | NM_030753.4                               | 76              | No           | Yes           |
